# Supplementary material for: Altering the Chain Length Specificity of a Lipase from Pleurotus citrinopileatus for the Application in Cheese Making
Source: MDPI journal article supplement (doi:10.3390/foods11172608), 2022-08-28
Supplement: s1 [file s1]

## Article

# Altering the Chain Length Specificity of a Lipase from *Pleurotus citrinopileatus* for the Application in Cheese Making

Niklas Broel <sup>1</sup>, Miriam A. Sowa <sup>1</sup>, Julia Manhard <sup>2</sup>, Alexander Siegl <sup>2</sup>, Edgar Weichhard <sup>2</sup>, Holger Zorn <sup>1</sup>, Binglin Li <sup>3,\*</sup> and Martin Gand <sup>1,\*</sup>

<sup>1</sup> Institute of Food Chemistry and Food Biotechnology, Justus Liebig University Giessen, 35392 Giessen, Germany

<sup>2</sup> OptiForm GmbH, 87466 Oy-Mittelberg, Germany

<sup>3</sup> College of Food Science and Engineering, Northwest University, Xi'an 710000, China

\* Correspondence: libinglin@nwu.edu.cn (B.L.); martin.gand@lcb.chemie.uni-giessen.de (M.G.)

**Table S1.** The primers used in this study to generate the different mutants. fw = forward, rv = reverse.

| Name of the mutant | Orientation | Sequence (5'→3')               |
|--------------------|-------------|--------------------------------|
| F91G               | fw          | GAATACCGTTGGCAAAGCCGTGTTTCCGG  |
|                    | rv          | CACGGCTTTGCCAACGGTATTCACCAGCAG |
| F91H               | fw          | GAATACCGTTCATAAAGCCGTGTTTCCGG  |
|                    | rv          | CACGGCTTTATGAACGGTATTCACCAGCAG |
| F91L               | fw          | GAATACCGTTCTGAAAGCCGTGTTTCCGG  |
|                    | rv          | CACGGCTTTCAGAACGGTATTCACCAGCAG |
| F91N               | fw          | GAATACCGTTAACAAGCCGTGTTTCCGG   |
|                    | rv          | CACGGCTTTGTAAACGGTATTCACCAGCA  |
| F91T               | fw          | GAATACCGTTACCAAAGCCGTGTTTCCGG  |
|                    | rv          | CACGGCTTTGGTAACGGTATTCACCAGCAG |
| F129A              | fw          | GGCGGCGCGGAAGTGGTAGTACCAGCATG  |
|                    | rv          | CCAGTTCCGCGCCGCCCAAAAATCCACACC |
| F129C              | fw          | GGCGGCTGCGAAGTGGTAGTACCAGCATG  |
|                    | rv          | CCAGTTCGCAGCCGCCCAAAAATCCACACC |
| F129M              | fw          | GGCGGCATGGAAGTGGTAGTACCAGCATG  |
|                    | rv          | CCAGTTCCATGCCGCCCAAAAATCCACACC |

| Name of the mutant | Orientation | Sequence (5'→3')                    |
|--------------------|-------------|-------------------------------------|
| F129R              | fw          | GGCGGCCGCGAACTGGGTAGTACCAGCATG      |
|                    | rv          | CCAGTTCGCGGCCGCGCCAAAAATCCACACC     |
| F129Q              | fw          | GGCGGCCAGGAACTGGGTAGTACCAGCATG      |
|                    | rv          | CCAGTTCCTGGCCGCGCCAAAAATCCACACC     |
| S163H              | fw          | GAATTATCGTCTGCATGGTTTTGGCTTTCTGGC   |
|                    | rv          | GCCAAAACCATGCAGACGATAATTCATGCTAAC   |
| S163M              | fw          | GAATTATCGTCTGATGGGTTTTGGCTTTCTGGC   |
|                    | rv          | GCCAAAACCCATCAGACGATAATTCATGCTAAC   |
| S163P              | fw          | GAATTATCGTCTGCCGGGTTTTGGCTTTCTGGC   |
|                    | rv          | GCCAAAACCCGGCAGACGATAATTCATGCTAAC   |
| S163V              | fw          | GAATTATCGTCTGGTGGGTTTTGGCTTTCTGGC   |
|                    | rv          | GCCAAAACCCACCAGACGATAATTCATGCTAAC   |
| S163Y              | fw          | GAATTATCGTCTGTACGGTTTTGGCTTTCTGGC   |
|                    | rv          | GCCAAAACCGTACAGACGATAATTCATGCTAAC   |
| I245F              | fw          | GCAGAGTGGTAGCCCGTTTCCGGTGGGCG       |
|                    | rv          | GTAATATCGCCCACCGGAAACGGGCTACCAC     |
| I245W              | fw          | CTTTATGCAGAGTGGTAGCCCGATTCCGGTG     |
|                    | rv          | CATGGGTAATATCGCCCACCGGAATCGGGC      |
| L300R              | fw          | CCGTTTATTTTGATTACCAGAGCCGTGTCTGG    |
|                    | rv          | CGGCAGCCATGCCAGAACACGGCTCTGG        |
| L300P              | fw          | CCGTTTATTTTGATTACCAGAGCCCGTTCTGG    |
|                    | rv          | CGGCAGCCATGCCAGAACCGGGCTCTGG        |
| L300I              | fw          | CCGTTTATTTTGATTACCAGAGCATTGTCTGG    |
|                    | rv          | CGGCAGCCATGCCAGAACAAATGCTCTGG       |
| L300Q              | fw          | CCCGTTTATTTTGATTACCAGAGCCTGGTTCTGGC |
|                    | rv          | GTACGCGGCAGCCATGCCAGAACCAGGCTCTGG   |

| Name of the mutant | Orientation | Sequence (5'→3')                 |
|--------------------|-------------|----------------------------------|
| L302F              | fw          | GAGCCTGGTTTTTCGCATGGCTGCCGCGTAC  |
|                    | rv          | GCAGCCATGCGAAAACCAGGCTCTGGTAATC  |
| L302G              | fw          | GAGCCTGGTTGGCGCATGGCTGCCGCGTAC   |
|                    | rv          | GCAGCCATGCGCCAACCAGGCTCTGGTAATC  |
| L302P              | fw          | GAGCCTGGTTCCGGCATGGCTGCCGCGTAC   |
|                    | rv          | GCAGCCATGCCGGAACCAGGCTCTGGTAATC  |
| L305A              | fw          | CTGGTTCTGGCATGGGCGCCCGTAC        |
|                    | rv          | GAAAGGTACCATCTGTACGCGGCGCCCATG   |
| L305M              | fw          | CTGGTTCTGGCATGGATGCCGCGTACAG     |
|                    | rv          | GAAAGGTACCATCTGTACGCGGCATCCATGCC |
| L305N              | fw          | CTGGTTCTGGCATGGAACCCGCGTACAG     |
|                    | rv          | GAAAGGTACCATCTGTACGCGGGTTCCATGCC |
| L305R              | fw          | CTGGTTCTGGCATGGCGTCCGCGTACAG     |
|                    | rv          | GAAAGGTACCATCTGTACGCGGACGCCATGCC |
| L305H              | fw          | CTGGTTCTGGCATGGCATCCGCGTACAG     |
|                    | rv          | GAAAGGTACCATCTGTACGCGGATGCCATGCC |
| L305Y              | fw          | CTGGTTCTGGCATGGTATCCGCGTACAG     |
|                    | rv          | GAAAGGTACCATCTGTACGCGGATACCATGCC |
| I529A              | fw          | CAAATCCGGCGTAAGCGGCCGCACTCGAGCAC |
|                    | rv          | CCGCTTACGCCGATTGTCAGGGTCAGGCC    |
| I529D              | fw          | CAAATCCGGATTAAGCGGCCGCACTCGAGCAC |
|                    | rv          | CCGCTTAATCCGATTGTCAGGGTCAGGCC    |
| I529E              | fw          | CAAATCCGGAATAAGCGGCCGCACTCGAGCAC |
|                    | rv          | CCGCTTATTCCGATTGTCAGGGTCAGGCC    |
| I529G              | fw          | CAAATCCGGGCTAAGCGGCCGCACTCGAGCAC |
|                    | rv          | CCGCTTAGCCCGATTGTCAGGGTCAGGCC    |
| I529W              | fw          | GACCCTGGCAAATCCGTGGTAAGCGGCCGC   |

| Name of the mutant | Orientation | Sequence (5'→3')              |
|--------------------|-------------|-------------------------------|
| rv                 |             | CTCGAGTGCGGCCGCTTACCACGGATTTC |

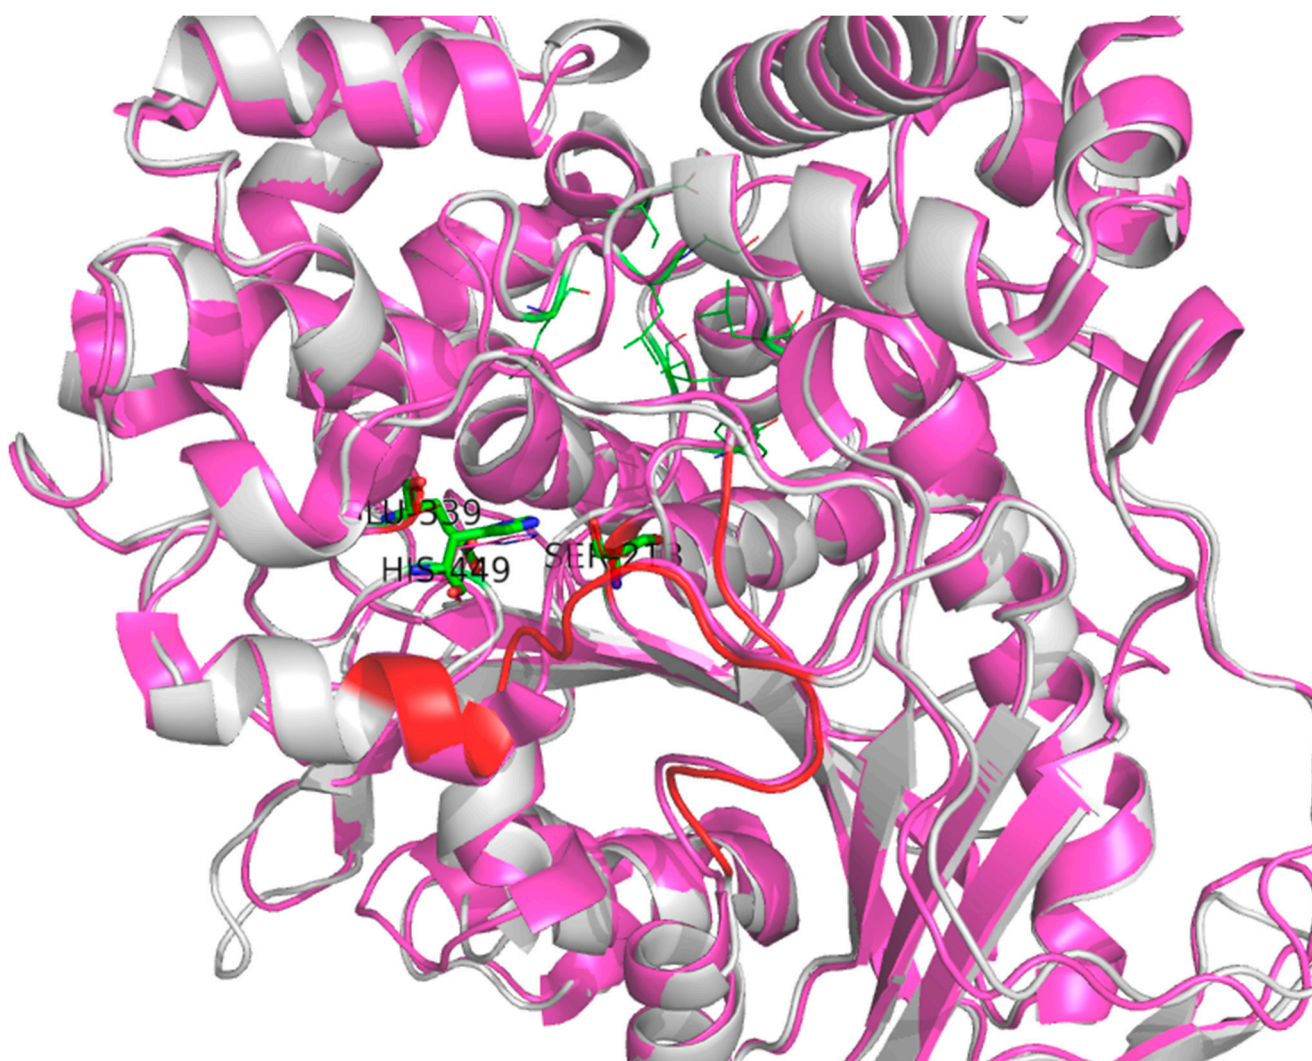

**Figure S1.** Structural alignment of the homology model of the PCI\_Lip (grey) and *Candida rugosa* lipase 2 (PDB ID 1GZ7, magenta). The carbon atoms of the catalytic triad are colored in green for the PCI or in magenta for the 1GZ7, the nitrogen atoms are blue and the oxygen atoms are colored in red. The backbone of the entrance of the active pocket is marked in red.

```

PCI_8383/PCI_Lip,_P._citrinopileatus  MNPLPRITSVILDSASFTGSTIGRVTKFLGIPYAQPFTGDRRFRLPAPIPAYTGTVRATS 60
1GZ7_1|Chains  ----APTALANGDTITGLNAIVNEKFLGIPFAEPPVGILRFKPPVPYSASLNGQQFTS 55
               *: . . : : ** .      *****: : ** * *: * * . : **

PCI_8383/PCI_Lip,_P._citrinopileatus  YGPSCPQAVSLPLPDGLAADVADL-LVNTVFKAVFPDSEDCLTILNVVVPNSATPTSCLP 119
1GZ7_1|Chains  YGPSCMQNPMGSEFDTLPKNALDLVLQSKIFQVVLNDEDCLTINVRPPGTRASAGLP 115
               ***** : * * . : ** * ..: : ** : *****: : * : : : **

PCI_8383/PCI_Lip,_P._citrinopileatus  VVWVIFGGGFELGSTSMYDGGGLIVERSIQLGEFVIYVSMNYRLSGFGFLASKVKVDAGVG 179
1GZ7_1|Chains  VMLWIFGGGFELGGSSLFPGDQMVAKSVLMGKPVIVSMNYRVASWGLAGPDIQNEGSG 175
               *: *****: : : * . : * : : : *****: : *****: : : * *

PCI_8383/PCI_Lip,_P._citrinopileatus  NLGLQDQREALRWIKYIGNFGGDPKVTIWGESAAGISAALHVMVANNGN----TEGLFR 235
1GZ7_1|Chains  NAGLHDQRLAMQWVADNIAGFGGDPKVTIYGESAGSMSTFVHLVWNVDGNTYNGKPLFR 235
               * : : : * : : . : * . *****: *****: : : * : * : : : : * : : * : :

PCI_8383/PCI_Lip,_P._citrinopileatus  GAFMQSGSPFVPGDI--THGQATYDAIVRDTGCAGSSDTLACLRAAPYSALKNAIDNTPF 293
1GZ7_1|Chains  AAIMQSGCMVPSDFVDGTGYTEIYNQVVASAGCGSASDKLACLRLSQTLYQATSDTFG 295
               . : *****: * . : : * : * * : : * : : : : : *****: . : * : * : : **

PCI_8383/PCI_Lip,_P._citrinopileatus  IFDYQSLVLAWLPRTDGTFLTNDPQSLVQQGKVANVPFITGDCDEGLTFLSLANLVTTT 353
1GZ7_1|Chains  VLAYPSLRLLSYLPDPDGTITDDMYALVRDGYAHVFPVIIGDQNDGLTFLGSSSLNVTTD 355
               : : * * * : : : : : *****: : : : : * : : * : : * : : : : : *****

PCI_8383/PCI_Lip,_P._citrinopileatus  SQLRTYLLKTIWLPGTDTQIDTLLSHYPLDLTQGSFYGTGILNALSPQFKRLASFQGDV 413
1GZ7_1|Chains  AQARAYFKQSFIH-ASDAEIDTLMAYTSDITQGSFPDGTGIFNAITPQFKRISALLGDLA 414
               : * : : * : : : : : : : : : * : : : : : : : : : : : : : : : : : * : .

PCI_8383/PCI_Lip,_P._citrinopileatus  FQAPRRYFLQQRSGKQNTWAFLSKRFKVAPFLGSPFASDIILNVYFGGE----LGDYLIN 468
1GZ7_1|Chains  FTLARRYFLNYYQGG-TKYSFLSKQLSGLPVLGTFFGNDIIVQDYLVGSGSVIYNNAFIA 473
               * : *****: . * ..: : *****: . : * : : * : : : : : : : : : : : : : :

PCI_8383/PCI_Lip,_P._citrinopileatus  FVNKLDPNAGAGINWPKYTTSSPNLVTFNDNLLFPVILSQDTFRRDAINFLTGLILANP 528
1GZ7_1|Chains  FANDLDPNKAGLWNTWPTYTSSSQSGNNLMQINGLGLYTGKDNFRPDAYSALF----SNP 529
               * . : ***** * * : : : : : : : : : : : : : : : : : : : : : : : : :

PCI_8383/PCI_Lip,_P._citrinopileatus  I----- 529
1GZ7_1|Chains  PSFFV 534

```

**Figure S2.** Sequence alignment of the PCI\_Lip and *Candida rugosa* lipase 2 (PDB ID 1GZ7), the catalytic triad was confirmed as S213, E339 and H449 (numbering according to the PCI\_Lip), which corresponds to the residues S209 (red box), E341 (blue box) and His449 (magenta box) and the oxy-anion hole is marked in green box (G126-G128).



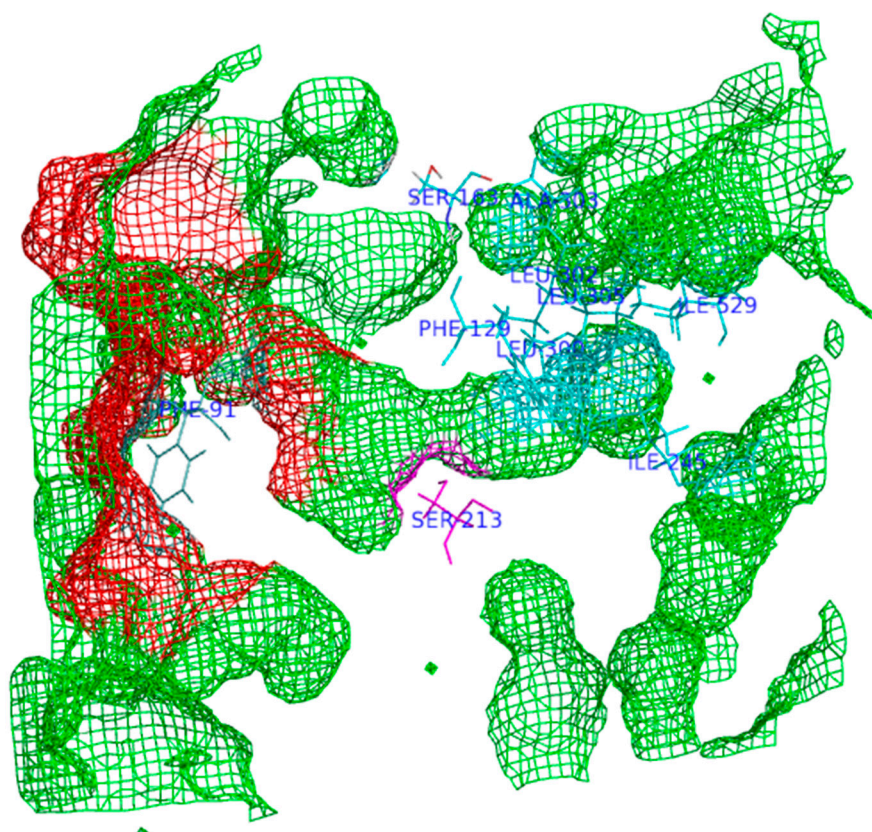

**Figure S3.** Analysis of the substrate tunnel by displaying the cavities around the nucleophilic S213 (marked in magenta), whereas the lid regions are marked in red. Tunnel restricting residues are colored in cyan. F91 is a special residues, as it is inside the lid region as well as forming part of the substrate entry tunnel.

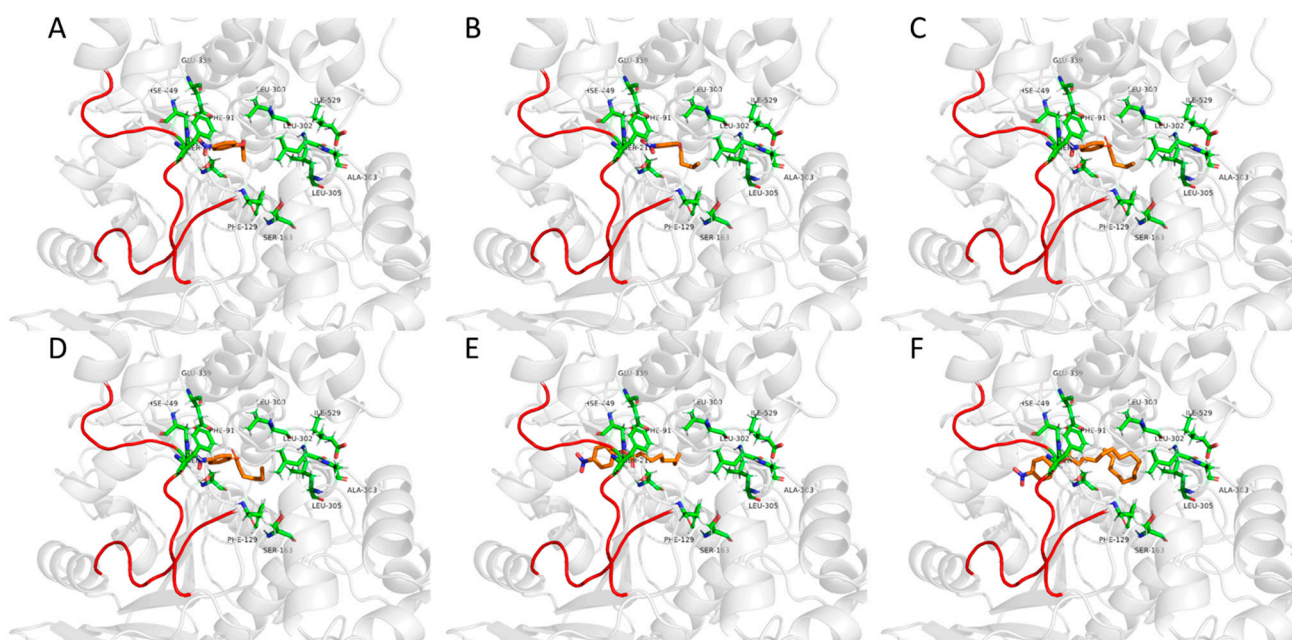

**Figure S4.** Docking of different chain length *p*-nitrophenol (pNP) esters inside the homology model of the PCI\_Lip. Only the best docking results are shown. The criteria of a meaningful docking result is the distance of the S213 towards the carboxyl carbon atom, which were set to be < 5.1 Å for pNPA, 4.9 Å for pNPB, 4.6 Å for pNPV, 4.5 Å for pNPH, 4.5 Å for pNPO Å and 4.3 Å for pNPP. The carbon

atoms of the protein are colored in green, the nitrogen atoms are blue and the oxygen atoms are colored in red. The carbon atoms of the *p*-nitrophenol (pNP) esters are colored in orange. (A) pNP-acetate (pNPA), (B) pNP-butyrate (pNPB), (C) pNP-valerate (pNPV), (D) pNP-hexanoate (pNPH), (E) pNP-octanoate (pNPO), and (F) pNP-palmitate (pNPP). HSE = prototropic tautomer of histidine, H on N2 in the histidine ring, according to the CHARMM force field.

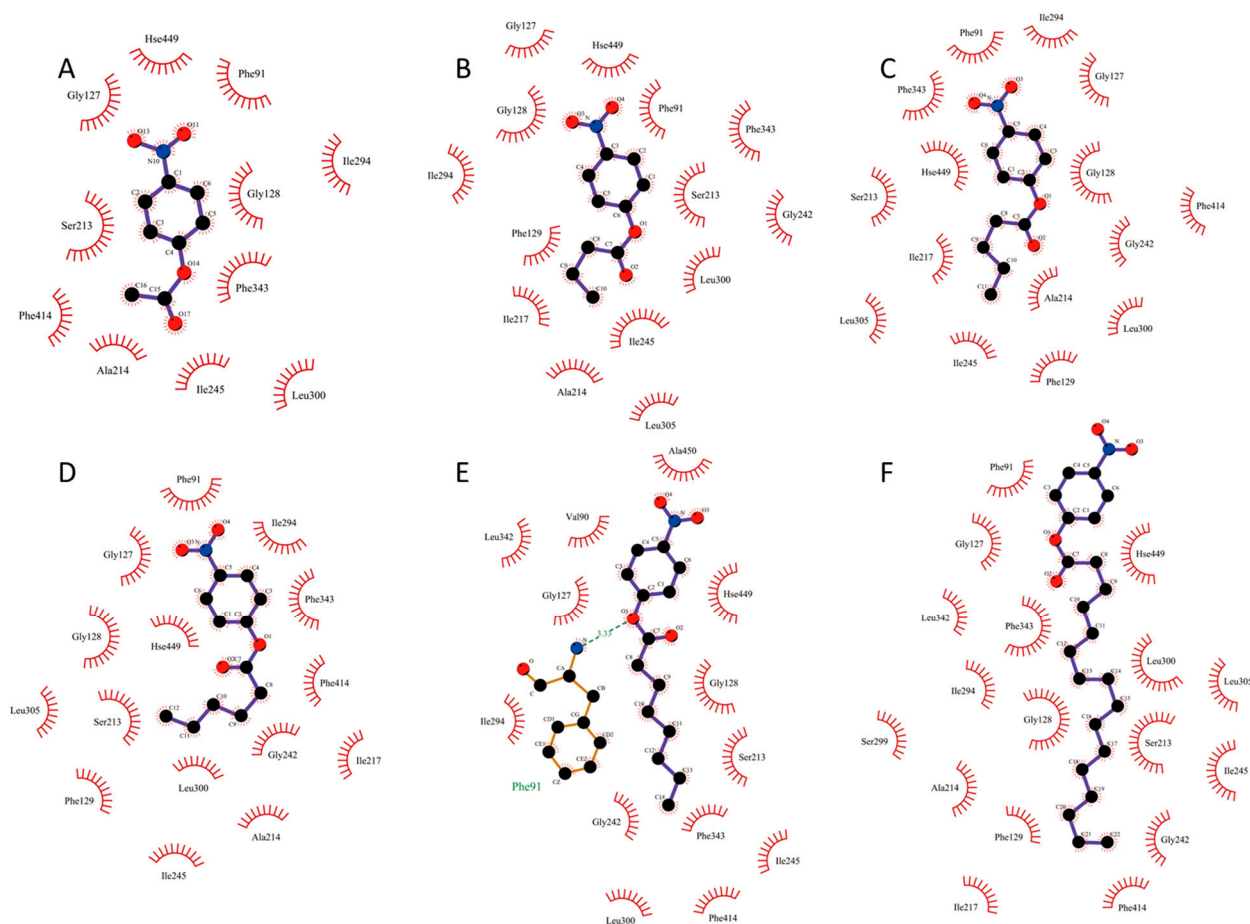

**Figure S5.** 2D pattern analysis of the docking of different chain length *p*-nitrophenol (pNP) esters inside the homology model of the PCI\_Lip generated by using the software LigPlot. Only the best docking results are shown. The residues of the protein which are in the interacting distance are marked with red half circles, the carbon atoms of the *p*-nitrophenol (pNP) esters are colored in orange. (A) pNP-acetate (pNPA), (B) pNP-butyrate (pNPB), (C) pNP-valerate (pNPV), (D) pNP-hexanoate (pNPH), (E) pNP-octanoate (pNPO), and (F) pNP-palmitate (pNPP). HSE = prototropic tautomer of histidine, H on N2 in the histidine ring, according to the CHARMM force field.

**Table S2.** Analysis of the free binding energy from the PCI\_Lip WT and all exchanges at position F91 for the docking results of pNPA. The empty unit means that substrates couldn't be docked into the active pocket. Affinity at best position means the docking affinity at the minimum distance.

| Mutant | Number of meaningful docking results | Minimum distance<br>[Å] | Affinity at best position<br>[kcal/mol] | Highest affinity<br>[kcal/mol] |
|--------|--------------------------------------|-------------------------|-----------------------------------------|--------------------------------|
| F91    | 2                                    | 5.1                     | −4.4                                    | −4.4                           |
| F91G   | 5                                    | 3.3                     | −4.9                                    | −5.3                           |
| F91P   |                                      |                         |                                         |                                |
| F91L   | 3                                    | 5.7                     | −5.8                                    | −6                             |
| F91A   | 3                                    | 5.2                     | −4.9                                    | −5.4                           |
| F91D   |                                      |                         |                                         |                                |
| F91E   |                                      |                         |                                         |                                |
| F91I   | 2                                    | 3.7                     | −4.9                                    | −5                             |
| F91M   |                                      |                         |                                         |                                |
| F91N   | 2                                    | 4.4                     | −5.8                                    | −5.8                           |
| F91Q   |                                      |                         |                                         |                                |
| F91R   |                                      |                         |                                         |                                |
| F91S   |                                      |                         |                                         |                                |
| F91V   | 1                                    | 3.7                     | −4.5                                    | −4.5                           |
| F91W   |                                      |                         |                                         |                                |
| F91Y   | 1                                    | 6.1                     | −3.9                                    | −3.9                           |
| F91K   |                                      |                         |                                         |                                |
| F91H   | 3                                    | 3.4                     | −5.8                                    | −5.8                           |
| F91C   |                                      |                         |                                         |                                |
| F91T   | 2                                    | 5.1                     | −4.4                                    | −4.4                           |

**Table S3.** Analysis of the free binding energy from the PCI\_Lip WT and all exchanges at position F91 for the docking results of pNPB. The empty unit means that substrates couldn't be docked into the active pocket. Affinity at best position means the docking affinity at the minimum distance.

| Mutant | Number of meaningful docking results | Minimum distance<br>[Å] | Affinity at best position<br>[kcal/mol] | Highest affinity<br>[kcal/mol] |
|--------|--------------------------------------|-------------------------|-----------------------------------------|--------------------------------|
| F91    | 3                                    | 4.9                     | −4.8                                    | −5.1                           |
| F91G   | 7                                    | 3.3                     | −5.4                                    | −5.9                           |
| F91P   |                                      |                         |                                         |                                |
| F91L   | 5                                    | 3.9                     | −5.8                                    | −6.5                           |
| F91A   | 1                                    | 3.4                     | −6.1                                    | −6.1                           |
| F91D   |                                      |                         |                                         |                                |
| F91E   | 2                                    | 5                       | −3.7                                    | −4.6                           |
| F91I   | 4                                    | 4.4                     | −5.7                                    | −6.3                           |
| F91M   |                                      |                         |                                         |                                |
| F91N   | 5                                    | 3.5                     | −5.6                                    | −5.9                           |
| F91Q   | 1                                    | 3.5                     | −6.5                                    | −6.5                           |



|      |   |     |      |      |
|------|---|-----|------|------|
| F91R |   |     |      |      |
| F91S | 3 | 5.2 | −4.8 | −5.3 |
| F91V | 1 | 6.1 | −4.8 | −4.8 |
| F91W |   |     |      |      |
| F91Y | 2 | 5.8 | −4.8 | −4.9 |
| F91K |   |     |      |      |
| F91H | 8 | 3.6 | −6   | −6.1 |
| F91C |   |     |      |      |
| F91T |   |     |      |      |

**Table S4.** Analysis of the free binding energy from the PCI\_Lip WT and all exchanges at position F91 for the docking results of pNPV. The empty unit means that substrates couldn't be docked into the active pocket. Affinity at best position means the docking affinity at the minimum distance.

| Mutant | Number of meaningful docking results | Minimum distance<br>[Å] | Affinity at best position<br>[kcal/mol] | Highest affinity<br>[kcal/mol] |
|--------|--------------------------------------|-------------------------|-----------------------------------------|--------------------------------|
| F91    | 5                                    | 4.6                     | −5.1                                    | −5.1                           |
| F91G   | 4                                    | 3.5                     | −5                                      | −5.9                           |
| F91P   |                                      |                         |                                         |                                |
| F91L   | 9                                    | 3.9                     | −5.7                                    | −6.8                           |
| F91A   |                                      |                         |                                         |                                |
| F91D   |                                      |                         |                                         |                                |
| F91E   | 3                                    | 3.5                     | −5.6                                    | −6                             |
| F91I   | 2                                    | 5                       | −6.1                                    | −6.1                           |
| F91M   | 1                                    | 5.8                     | −5.8                                    | −5.8                           |
| F91N   | 6                                    | 3.3                     | −5.3                                    | −6.2                           |
| F91Q   |                                      |                         |                                         |                                |
| F91R   |                                      |                         |                                         |                                |
| F91S   | 3                                    | 4                       | −5.2                                    | −5.6                           |
| F91V   |                                      |                         |                                         |                                |
| F91W   |                                      |                         |                                         |                                |
| F91Y   | 6                                    | 5.6                     | −5.7                                    | −6                             |
| F91K   |                                      |                         |                                         |                                |
| F91H   | 6                                    | 3.6                     | −5.8                                    | −6.1                           |
| F91C   |                                      |                         |                                         |                                |
| F91T   | 2                                    | 2.7                     | −5.6                                    | −5.6                           |

**Table S5.** Analysis of the free binding energy from the PCI\_Lip WT and all exchanges at position F91 for the docking results of pNPH. The empty unit means that substrates couldn't be docked into the active pocket. Affinity at best position means the docking affinity at the minimum distance.

| Mutant | Number of meaningful docking results | Minimum distance<br>[Å] | Affinity at best position<br>[kcal/mol] | Highest affinity<br>[kcal/mol] |
|--------|--------------------------------------|-------------------------|-----------------------------------------|--------------------------------|
| F91    | 3                                    | 4.5                     | −5.8                                    | −5.9                           |
| F91G   | 7                                    | 3.2                     | −5.4                                    | −5.4                           |
| F91P   |                                      |                         |                                         |                                |
| F91L   | 8                                    | 3.7                     | −6.1                                    | −7                             |
| F91A   | 2                                    | 3.3                     | −4.6                                    | −5.7                           |
| F91D   |                                      |                         |                                         |                                |
| F91E   | 2                                    | 3.4                     | −5                                      | −5                             |
| F91I   | 4                                    | 5                       | −6                                      | −6.7                           |
| F91M   |                                      |                         |                                         |                                |
| F91N   | 5                                    | 3.5                     | −6.4                                    | −6.4                           |
| F91Q   |                                      |                         |                                         |                                |
| F91R   |                                      |                         |                                         |                                |
| F91S   | 1                                    | 5.3                     | −5.2                                    | −5.2                           |
| F91V   |                                      |                         |                                         |                                |
| F91W   |                                      |                         |                                         |                                |
| F91Y   | 3                                    | 5.5                     | −5.1                                    | −5.1                           |
| F91K   |                                      |                         |                                         |                                |
| F91H   | 8                                    | 3.8                     | −5.4                                    | −5.7                           |
| F91C   |                                      |                         |                                         |                                |
| F91T   | 3                                    | 2.9                     | −5.7                                    | −5.7                           |

**Table S6.** Analysis of the free binding energy from the PCI\_Lip WT and all exchanges at position F91 for the docking results of pNPO. The empty unit means that substrates couldn't be docked into the active pocket. Affinity at best position means the docking affinity at the minimum distance.

| Mutant | Number of meaningful docking results | Minimum distance<br>[Å] | Affinity at best position<br>[kcal/mol] | Highest affinity<br>[kcal/mol] |
|--------|--------------------------------------|-------------------------|-----------------------------------------|--------------------------------|
| F91    | 5                                    | 4.5                     | −5.8                                    | −5.9                           |
| F91G   | 5                                    | 2.7                     | −4                                      | −5.6                           |
| F91P   |                                      |                         |                                         |                                |
| F91L   | 8                                    | 4.5                     | −6.2                                    | −7.6                           |
| F91A   | 3                                    | 3.4                     | −5.8                                    | −5.8                           |
| F91D   |                                      |                         |                                         |                                |
| F91E   | 4                                    | 3.4                     | −5.8                                    | −6.1                           |
| F91I   | 6                                    | 4.6                     | −5.6                                    | −6.4                           |
| F91M   |                                      |                         |                                         |                                |
| F91N   | 4                                    | 3.9                     | −6                                      | −6.8                           |
| F91Q   |                                      |                         |                                         |                                |

|      |    |     |      |      |
|------|----|-----|------|------|
| F91R |    |     |      |      |
| F91S | 3  | 4.9 | −4.6 | −5.1 |
| F91V |    |     |      |      |
| F91W |    |     |      |      |
| F91Y | 5  | 4.5 | −4.9 | −6   |
| F91K |    |     |      |      |
| F91H | 11 | 3.6 | −5.4 | −6.3 |
| F91C |    |     |      |      |
| F91T | 3  | 2.7 | −5.8 | −6.3 |

**Table S7.** Analysis of the free binding energy from the PCI\_Lip WT and all exchanges at position F91 for the docking results of pNPP. The empty unit means that substrates couldn't be docked into the active pocket. Affinity at best position means the docking affinity at the minimum distance.

| Mutant | Number of meaningful docking results | Minimum distance<br>[Å] | Affinity at best position<br>[kcal/mol] | Highest affinity<br>[kcal/mol] |
|--------|--------------------------------------|-------------------------|-----------------------------------------|--------------------------------|
| F91    | 6                                    | 4.3                     | −4.2                                    | −5.5                           |
| F91G   | 4                                    | 2.9                     | −3.7                                    | −3.7                           |
| F91P   |                                      |                         |                                         |                                |
| F91L   | 13                                   | 3.6                     | −4.6                                    | −4.6                           |
| F91A   | 4                                    | 3.5                     | −6.1                                    | −6.1                           |
| F91D   |                                      |                         |                                         |                                |
| F91E   | 3                                    | 3.8                     | −6.7                                    | −6.7                           |
| F91I   | 7                                    | 3.7                     | −6.8                                    | −7                             |
| F91M   | 1                                    | 5.9                     | −7.5                                    | −7.5                           |
| F91N   | 3                                    | 3.9                     | −7.1                                    | −7.1                           |
| F91Q   |                                      |                         |                                         |                                |
| F91R   |                                      |                         |                                         |                                |
| F91S   |                                      |                         |                                         |                                |
| F91V   | 1                                    | 3.9                     | −5.7                                    | −5.7                           |
| F91W   |                                      |                         |                                         |                                |
| F91Y   | 7                                    | 2.8                     | −5.4                                    | −6.1                           |
| F91K   |                                      |                         |                                         |                                |
| F91H   | 6                                    | 3.4                     | −6.6                                    | −6.6                           |
| F91C   |                                      |                         |                                         |                                |
| F91T   | 3                                    | 2.7                     | −6.8                                    | −6.8                           |

**Table S8.** Analysis of the free binding energy from the PCI\_Lip WT and all exchanges at position L302 for the docking results of pNPA. The empty unit means that substrates couldn't be docked into the active pocket. Affinity at best position means the docking affinity at the minimum distance.

| Mutant | Number of meaningful docking results | Minimum distance<br>[Å] | Affinity at best position<br>[kcal/mol] | Highest affinity<br>[kcal/mol] |
|--------|--------------------------------------|-------------------------|-----------------------------------------|--------------------------------|
| L302   | 2                                    | 5.1                     | −4.4                                    | −4.4                           |
| L302G  | 5                                    | 3.7                     | −6.7                                    | −6.7                           |
| L302P  | 5                                    | 3.9                     | −5.1                                    | −5.5                           |
| L302F  | 1                                    | 3.9                     | −2.8                                    | −2.8                           |
| L302A  |                                      |                         |                                         |                                |
| L302D  | 1                                    | 6.2                     | −5.2                                    | −5.2                           |
| L302E  |                                      |                         |                                         |                                |
| L302I  |                                      |                         |                                         |                                |
| L302M  |                                      |                         |                                         |                                |
| L302N  |                                      |                         |                                         |                                |
| L302Q  | 6                                    | 4.9                     | −4.8                                    | −5.6                           |
| L302R  |                                      |                         |                                         |                                |
| L302S  |                                      |                         |                                         |                                |
| L302V  |                                      |                         |                                         |                                |
| L302W  |                                      |                         |                                         |                                |
| L302Y  | 2                                    | 4.7                     | −5.5                                    | −5.5                           |
| L302K  | 1                                    | 4                       | −4.5                                    | −4.5                           |
| L302H  | 1                                    | 6.4                     | −4.2                                    | −4.2                           |
| L302C  |                                      |                         |                                         |                                |
| L302T  |                                      |                         |                                         |                                |

**Table S9.** Analysis of the free binding energy from the PCI\_Lip WT and all exchanges at position L302 for the docking results of pNPB. The empty unit means that substrates couldn't be docked into the active pocket. Affinity at best position means the docking affinity at the minimum distance.

| Mutant | Number of meaningful docking results | Minimum distance<br>[Å] | Affinity at best position<br>[kcal/mol] | Highest affinity<br>[kcal/mol] |
|--------|--------------------------------------|-------------------------|-----------------------------------------|--------------------------------|
| L302   | 3                                    | 4.9                     | −4.8                                    | −5.1                           |
| L302G  | 8                                    | 3.3                     | −6.8                                    | −7.1                           |
| L302P  | 6                                    | 3.9                     | −5.7                                    | −5.8                           |
| L302F  | 1                                    | 4.1                     | −3.5                                    | −3.5                           |
| L302A  |                                      |                         |                                         |                                |
| L302D  | 3                                    | 4.2                     | −5.5                                    | −5.5                           |
| L302E  |                                      |                         |                                         |                                |
| L302I  |                                      |                         |                                         |                                |
| L302M  |                                      |                         |                                         |                                |
| L302N  | 4                                    | 5.8                     | −6.2                                    | −6.3                           |
| L302Q  | 4                                    | 3.4                     | −5.7                                    | −6.2                           |

|       |   |     |      |      |
|-------|---|-----|------|------|
| L302R |   |     |      |      |
| L302S |   |     |      |      |
| L302V | 3 | 5.4 | −3.7 | −3.7 |
| L302W | 4 | 4.9 | 1.1  | 0.1  |
| L302Y | 2 | 5.1 | −5.9 | −6.1 |
| L302K | 1 | 5   | −4.9 | −4.9 |
| L302H | 1 | 6.4 | −4.6 | −4.6 |
| L302C |   |     |      |      |
| L302T |   |     |      |      |

**Table S10.** Analysis of the free binding energy from the PCI\_Lip WT and all exchanges at position L302 for the docking results of pNPV. The empty unit means that substrates couldn't be docked into the active pocket. Affinity at best position means the docking affinity at the minimum distance.

| Mutant | Number of meaningful docking results | Minimum distance<br>[Å] | Affinity at best position<br>[kcal/mol] | Highest affinity<br>[kcal/mol] |
|--------|--------------------------------------|-------------------------|-----------------------------------------|--------------------------------|
| L302   | 5                                    | 4.6                     | −5.1                                    | −5.1                           |
| L302G  | 8                                    | 3.3                     | −7.2                                    | −7.2                           |
| L302P  | 6                                    | 5.3                     | −5.5                                    | −5.8                           |
| L302F  | 1                                    | 5.2                     | −3.7                                    | −3.7                           |
| L302A  |                                      |                         |                                         |                                |
| L302D  | 2                                    | 6                       | −5.5                                    | −5.5                           |
| L302E  | 1                                    | 5                       | −2.7                                    | −2.7                           |
| L302I  |                                      |                         |                                         |                                |
| L302M  |                                      |                         |                                         |                                |
| L302N  | 1                                    | 5.8                     | −5.9                                    | −5.9                           |
| L302Q  | 4                                    | 4                       | −5.7                                    | −6.4                           |
| L302R  |                                      |                         |                                         |                                |
| L302S  |                                      |                         |                                         |                                |
| L302V  | 1                                    | 6.5                     | −4.5                                    | −4.5                           |
| L302W  |                                      |                         |                                         |                                |
| L302Y  |                                      |                         |                                         |                                |
| L302K  |                                      |                         |                                         |                                |
| L302H  |                                      |                         |                                         |                                |
| L302C  |                                      |                         |                                         |                                |
| L302T  |                                      |                         |                                         |                                |



**Table S11.** Analysis of the free binding energy from the PCI\_Lip WT and all exchanges at position L302 for the docking results of pNPH. The empty unit means that substrates couldn't be docked into the active pocket. Affinity at best position means the docking affinity at the minimum distance.

| Mutant | Number of meaningful docking results | Minimum distance<br>[Å] | Affinity at best position<br>[kcal/mol] | Highest affinity<br>[kcal/mol] |
|--------|--------------------------------------|-------------------------|-----------------------------------------|--------------------------------|
| L302   | 3                                    | 4.5                     | −5.8                                    | −5.9                           |
| L302G  | 10                                   | 3.3                     | −7.1                                    | −7.3                           |
| L302P  | 7                                    | 4.4                     | −5.5                                    | −5.9                           |
| L302F  | 3                                    | 4.1                     | −3.8                                    | −5                             |
| L302A  |                                      |                         |                                         |                                |
| L302D  | 3                                    | 4.3                     | −5.9                                    | −5.9                           |
| L302E  |                                      |                         |                                         |                                |
| L302I  |                                      |                         |                                         |                                |
| L302M  |                                      |                         |                                         |                                |
| L302N  | 3                                    | 5.3                     | −6.4                                    | −6.4                           |
| L302Q  | 4                                    | 5.2                     | −6.1                                    | −6.2                           |
| L302R  |                                      |                         |                                         |                                |
| L302S  |                                      |                         |                                         |                                |
| L302V  | 3                                    | 5.3                     | −4.1                                    | −4.8                           |
| L302W  |                                      |                         |                                         |                                |
| L302Y  | 1                                    | 5.4                     | −4.9                                    | −4.9                           |
| L302K  |                                      |                         |                                         |                                |
| L302H  |                                      |                         |                                         |                                |
| L302C  |                                      |                         |                                         |                                |
| L302T  |                                      |                         |                                         |                                |

**Table S12.** Analysis of the free binding energy from the PCI\_Lip WT and all exchanges at position L302 for the docking results of pNPO. The empty unit means that substrates couldn't be docked into the active pocket. Affinity at best position means the docking affinity at the minimum distance.

| Mutant | Number of meaningful docking results | Minimum distance<br>[Å] | Affinity at best position<br>[kcal/mol] | Highest affinity<br>[kcal/mol] |
|--------|--------------------------------------|-------------------------|-----------------------------------------|--------------------------------|
| L302   | 5                                    | 4.5                     | −5.8                                    | −5.9                           |
| L302G  | 12                                   | 2.8                     | −5.2                                    | −7.8                           |
| L302P  | 11                                   | 4                       | −5.3                                    | −5.9                           |
| L302F  | 4                                    | 4.3                     | −4                                      | −4.5                           |
| L302A  |                                      |                         |                                         |                                |
| L302D  | 2                                    | 4.7                     | −6                                      | −6                             |
| L302E  | 1                                    | 4.5                     | −3.1                                    | −3.1                           |
| L302I  |                                      |                         |                                         |                                |
| L302M  |                                      |                         |                                         |                                |
| L302N  | 2                                    | 6.1                     | −5.8                                    | −6.4                           |
| L302Q  | 7                                    | 5.5                     | −5.7                                    | −5.8                           |

|       |   |     |      |      |
|-------|---|-----|------|------|
| L302R |   |     |      |      |
| L302S |   |     |      |      |
| L302V | 1 | 6.3 | −5.2 | −5.2 |
| L302W |   |     |      |      |
| L302Y | 2 | 4.9 | −5.5 | −5.5 |
| L302K |   |     |      |      |
| L302H |   |     |      |      |
| L302C |   |     |      |      |
| L302T |   |     |      |      |

**Table S13.** Analysis of the free binding energy from the PCI\_Lip WT and all exchanges at position L302 for the docking results of pNPP. The empty unit means that substrates couldn't be docked into the active pocket. Affinity at best position means the docking affinity at the minimum distance.

| Mutant | Number of meaningful docking results | Minimum distance<br>[Å] | Affinity at best position<br>[kcal/mol] | Highest affinity<br>[kcal/mol] |
|--------|--------------------------------------|-------------------------|-----------------------------------------|--------------------------------|
| L302   | 6                                    | 4.3                     | −4.2                                    | −5.5                           |
| L302G  | 8                                    | 3.7                     | −6.6                                    | −7.7                           |
| L302P  | 7                                    | 3.9                     | −6.4                                    | −7.6                           |
| L302F  |                                      |                         |                                         |                                |
| L302A  |                                      |                         |                                         |                                |
| L302D  | 3                                    | 5.1                     | −6.5                                    | −6.5                           |
| L302E  |                                      |                         |                                         |                                |
| L302I  |                                      |                         |                                         |                                |
| L302M  |                                      |                         |                                         |                                |
| L302N  | 2                                    | 5.3                     | −6.5                                    | −6.5                           |
| L302Q  | 10                                   | 3.4                     | −6.7                                    | −7                             |
| L302R  |                                      |                         |                                         |                                |
| L302S  |                                      |                         |                                         |                                |
| L302V  | 2                                    | 6.1                     | −3.7                                    | −4.9                           |
| L302W  | 4                                    | 5.6                     | 5.1                                     | 5.1                            |
| L302Y  | 1                                    | 5.5                     | −0.6                                    | −0.6                           |
| L302K  |                                      |                         |                                         |                                |
| L302H  |                                      |                         |                                         |                                |
| L302C  |                                      |                         |                                         |                                |
| L302T  |                                      |                         |                                         |                                |

**Table S14.** Analysis of the free binding energy from the PCI\_Lip WT and all exchanges at position L300 for the docking results of pNPA. The empty unit means that substrates couldn't be docked into the active pocket. Affinity at best position means the docking affinity at the minimum distance.

| Mutant | Number of meaningful docking results | Minimum distance<br>[Å] | Affinity at best position<br>[kcal/mol] | Highest affinity<br>[kcal/mol] |
|--------|--------------------------------------|-------------------------|-----------------------------------------|--------------------------------|
| L300   | 2                                    | 5.1                     | −4.4                                    | −4.4                           |
| L300G  |                                      |                         |                                         |                                |
| L300P  | 6                                    | 3.4                     | −5.8                                    | −6.4                           |
| L300F  | 3                                    | 5.7                     | −5.8                                    | −6                             |
| L300A  | 2                                    | 3.8                     | −5.9                                    | −5.9                           |
| L300D  |                                      |                         |                                         |                                |
| L300E  |                                      |                         |                                         |                                |
| L300I  | 5                                    | 4.4                     | −5.2                                    | −6                             |
| L300M  | 7                                    | 4.9                     | −6                                      | −6                             |
| L300N  | 1                                    | 5.4                     | −2.8                                    | −2.8                           |
| L300Q  | 3                                    | 4.5                     | −5.6                                    | −5.6                           |
| L300R  | 5                                    | 4.9                     | −4.7                                    | −6.4                           |
| L300S  |                                      |                         |                                         |                                |
| L300V  |                                      |                         |                                         |                                |
| L300W  |                                      |                         |                                         |                                |
| L300Y  |                                      |                         |                                         |                                |
| L300K  |                                      |                         |                                         |                                |
| L300H  |                                      |                         |                                         |                                |
| L300C  |                                      |                         |                                         |                                |
| L300T  |                                      |                         |                                         |                                |

**Table S15.** Analysis of the free binding energy from the PCI\_Lip WT and all exchanges at position L300 for the docking results of pNPB. The empty unit means that substrates couldn't be docked into the active pocket. Affinity at best position means the docking affinity at the minimum distance.

| Mutant | Number of meaningful docking results | Minimum distance<br>[Å] | Affinity at best position<br>[kcal/mol] | Highest affinity<br>[kcal/mol] |
|--------|--------------------------------------|-------------------------|-----------------------------------------|--------------------------------|
| L300   | 3                                    | 4.9                     | −4.8                                    | −5.1                           |
| L300G  |                                      |                         |                                         |                                |
| L300P  | 4                                    | 4.2                     | −6.6                                    | −6.6                           |
| L300F  | 5                                    | 3.9                     | −5.8                                    | −6.5                           |
| L300A  | 4                                    | 3.7                     | −5.8                                    | −5.9                           |
| L300D  | 2                                    | 5.1                     | −4.9                                    | −5.1                           |
| L300E  |                                      |                         |                                         |                                |
| L300I  | 5                                    | 5.1                     | −5.9                                    | −6.1                           |
| L300M  | 6                                    | 5.5                     | −5.5                                    | −6.6                           |
| L300N  | 6                                    | 3.5                     | −2.1                                    | −4.7                           |
| L300Q  | 3                                    | 3.8                     | −6.2                                    | −6.3                           |

|       |   |     |      |      |
|-------|---|-----|------|------|
| L300R | 6 | 4.1 | −6.2 | −7   |
| L300S | 1 | 5.9 | −1.9 | −1.9 |
| L300V |   |     |      |      |
| L300W |   |     |      |      |
| L300Y |   |     |      |      |
| L300K |   |     |      |      |
| L300H |   |     |      |      |
| L300C |   |     |      |      |
| L300T | 1 | 6.2 | −5   | −5   |

**Table S16.** Analysis of the free binding energy from the PCI\_Lip WT and all exchanges at position L300 for the docking results of pNPV. The empty unit means that substrates couldn't be docked into the active pocket. Affinity at best position means the docking affinity at the minimum distance.

| Mutant | Number of meaningful docking results | Minimum distance<br>[Å] | Affinity at best position<br>[kcal/mol] | Highest affinity<br>[kcal/mol] |
|--------|--------------------------------------|-------------------------|-----------------------------------------|--------------------------------|
| L300   | 5                                    | 4.6                     | −5.1                                    | −5.1                           |
| L300G  |                                      |                         |                                         |                                |
| L300P  | 3                                    | 3.8                     | −6.4                                    | −6.7                           |
| L300F  | 9                                    | 3.9                     | −5.7                                    | −6.8                           |
| L300A  | 3                                    | 3.2                     | −5.5                                    | −6.2                           |
| L300D  | 1                                    | 5.7                     | −5.5                                    | −5.5                           |
| L300E  | 4                                    | 3.4                     | −2.7                                    | −4.5                           |
| L300I  | 6                                    | 5                       | −6                                      | −6.2                           |
| L300M  | 5                                    | 5.7                     | −6.5                                    | −6.5                           |
| L300N  | 1                                    | 6.3                     | −3.9                                    | −3.9                           |
| L300Q  | 4                                    | 4.1                     | −5.7                                    | −6.2                           |
| L300R  | 6                                    | 4.1                     | −6.3                                    | −7.1                           |
| L300S  | 2                                    | 5.5                     | −2.1                                    | −2.2                           |
| L300V  |                                      |                         |                                         |                                |
| L300W  |                                      |                         |                                         |                                |
| L300Y  |                                      |                         |                                         |                                |
| L300K  | 1                                    | 5.6                     | −5.7                                    | −5.7                           |
| L300H  |                                      |                         |                                         |                                |
| L300C  |                                      |                         |                                         |                                |
| L300T  |                                      |                         |                                         |                                |

**Table S17.** Analysis of the free binding energy from the PCI\_Lip WT and all exchanges at position L300 for the docking results of pNPH. The empty unit means that substrates couldn't be docked into the active pocket. Affinity at best position means the docking affinity at the minimum distance.

| Mutant | Number of meaningful docking results | Minimum distance<br>[Å] | Affinity at best position<br>[kcal/mol] | Highest affinity<br>[kcal/mol] |
|--------|--------------------------------------|-------------------------|-----------------------------------------|--------------------------------|
| L300   | 3                                    | 4.5                     | −5.8                                    | −5.9                           |
| L300G  |                                      |                         |                                         |                                |
| L300P  | 9                                    | 3.5                     | −6.9                                    | −7.3                           |
| L300F  | 8                                    | 3.7                     | −6.1                                    | −7                             |
| L300A  | 2                                    | 5.8                     | −5.5                                    | −5.5                           |
| L300D  | 2                                    | 6.2                     | −5.2                                    | −5.2                           |
| L300E  | 3                                    | 3.6                     | −2.6                                    | −5.7                           |
| L300I  | 11                                   | 4.6                     | −5.7                                    | −6.5                           |
| L300M  | 5                                    | 5.2                     | −5.8                                    | −6.8                           |
| L300N  | 3                                    | 3.4                     | −2.2                                    | −3.8                           |
| L300Q  | 1                                    | 3.9                     | −6.1                                    | −6.1                           |
| L300R  | 9                                    | 4.2                     | −6.4                                    | −7.1                           |
| L300S  |                                      |                         |                                         |                                |
| L300V  |                                      |                         |                                         |                                |
| L300W  |                                      |                         |                                         |                                |
| L300Y  |                                      |                         |                                         |                                |
| L300K  |                                      |                         |                                         |                                |
| L300H  |                                      |                         |                                         |                                |
| L300C  |                                      |                         |                                         |                                |
| L300T  |                                      |                         |                                         |                                |

**Table S18.** Analysis of the free binding energy from the PCI\_Lip WT and all exchanges at position L300 for the docking results of pNPO. The empty unit means that substrates couldn't be docked into the active pocket. Affinity at best position means the docking affinity at the minimum distance.

| Mutant | Number of meaningful docking results | Minimum distance<br>[Å] | Affinity at best position<br>[kcal/mol] | Highest affinity<br>[kcal/mol] |
|--------|--------------------------------------|-------------------------|-----------------------------------------|--------------------------------|
| L300   | 5                                    | 4.5                     | −5.8                                    | −5.9                           |
| L300G  |                                      |                         |                                         |                                |
| L300P  | 8                                    | 3.6                     | −7                                      | −7.3                           |
| L300F  | 8                                    | 4.5                     | −6.2                                    | −7.6                           |
| L300A  | 1                                    | 5.9                     | −3.5                                    | −3.5                           |
| L300D  | 2                                    | 4.1                     | −5.4                                    | −5.4                           |
| L300E  |                                      |                         |                                         |                                |
| L300I  | 9                                    | 4.4                     | −6.2                                    | −6.9                           |
| L300M  | 3                                    | 4.6                     | −4.6                                    | −6.9                           |
| L300N  | 1                                    | 6.2                     | −1.9                                    | −1.9                           |
| L300Q  | 4                                    | 3.5                     | −4.7                                    | −6.1                           |



|       |   |     |      |      |
|-------|---|-----|------|------|
| L300R | 5 | 4   | −6.4 | −7.3 |
| L300S | 1 | 5.6 | −1.1 | −1.1 |
| L300V |   |     |      |      |
| L300W |   |     |      |      |
| L300Y |   |     |      |      |
| L300K |   |     |      |      |
| L300H |   |     |      |      |
| L300C |   |     |      |      |
| L300T |   |     |      |      |

**Table S19.** Analysis of the free binding energy from the PCI\_Lip WT and all exchanges at position L300 for the docking results of pNPP. The empty unit means that substrates couldn't be docked into the active pocket. Affinity at best position means the docking affinity at the minimum distance.

| Mutant | Number of meaningful docking results | Minimum distance<br>[Å] | Affinity at best position<br>[kcal/mol] | Highest affinity<br>[kcal/mol] |
|--------|--------------------------------------|-------------------------|-----------------------------------------|--------------------------------|
| L300   | 6                                    | 4.3                     | −4.2                                    | −5.5                           |
| L300G  |                                      |                         |                                         |                                |
| L300P  | 9                                    | 4.1                     | −5.8                                    | −7.7                           |
| L300F  | 13                                   | 3.6                     | −4.6                                    | −4.6                           |
| L300A  | 4                                    | 3.7                     | −6.8                                    | −7.5                           |
| L300D  | 1                                    | 4                       | −6.1                                    | −6.1                           |
| L300E  | 3                                    | 5.3                     | −3                                      | −3.4                           |
| L300I  | 6                                    | 4.6                     | −5.7                                    | −6.1                           |
| L300M  | 2                                    | 5.5                     | −5.6                                    | −6.5                           |
| L300N  |                                      |                         |                                         |                                |
| L300Q  |                                      |                         |                                         |                                |
| L300R  | 7                                    | 5.8                     | −5.7                                    | −6.2                           |
| L300S  | 3                                    | 4.8                     | 1.6                                     | 0.7                            |
| L300V  |                                      |                         |                                         |                                |
| L300W  |                                      |                         |                                         |                                |
| L300Y  | 1                                    | 6.4                     | −3.7                                    | −3.7                           |
| L300K  | 2                                    | 3.4                     | −6                                      | −6                             |
| L300H  |                                      |                         |                                         |                                |
| L300C  |                                      |                         |                                         |                                |
| L300T  |                                      |                         |                                         |                                |

**Table S20.** Analysis of the free binding energy from the PCI\_Lip WT and all exchanges at position L305 for the docking results of pNPA. The empty unit means that substrates couldn't be docked into the active pocket. Affinity at best position means the docking affinity at the minimum distance.

| Mutant | Number of meaningful docking results | Minimum distance<br>[Å] | Affinity at best position<br>[kcal/mol] | Highest affinity<br>[kcal/mol] |
|--------|--------------------------------------|-------------------------|-----------------------------------------|--------------------------------|
| L305   | 2                                    | 5.1                     | −4.4                                    | −4.4                           |
| L305G  |                                      |                         |                                         |                                |
| L305P  |                                      |                         |                                         |                                |
| L305F  |                                      |                         |                                         |                                |
| L305A  | 3                                    | 4.1                     | −4.6                                    | −4.9                           |
| L305D  |                                      |                         |                                         |                                |
| L305E  |                                      |                         |                                         |                                |
| L305I  | 2                                    | 5.2                     | −5.2                                    | −5.5                           |
| L305M  | 4                                    | 4                       | −5.8                                    | −5.8                           |
| L305N  | 3                                    | 4.3                     | −5.8                                    | −5.8                           |
| L305Q  | 3                                    | 4.7                     | −0.3                                    | −1.6                           |
| L305R  | 4                                    | −1.3                    | −5.6                                    | −5.6                           |
| L305S  |                                      |                         |                                         |                                |
| L305V  |                                      |                         |                                         |                                |
| L305W  |                                      |                         |                                         |                                |
| L305Y  | 4                                    | 4.1                     | −5                                      | −5                             |
| L305K  |                                      |                         |                                         |                                |
| L305H  | 1                                    | 3.6                     | −4.7                                    | −4.7                           |
| L305C  |                                      |                         |                                         |                                |
| L305T  |                                      |                         |                                         |                                |

**Table S21.** Analysis of the free binding energy from the PCI\_Lip WT and all exchanges at position L305 for the docking results of pNPB. The empty unit means that substrates couldn't be docked into the active pocket. Affinity at best position means the docking affinity at the minimum distance.

| Mutant | Number of meaningful docking results | Minimum distance<br>[Å] | Affinity at best position<br>[kcal/mol] | Highest affinity<br>[kcal/mol] |
|--------|--------------------------------------|-------------------------|-----------------------------------------|--------------------------------|
| L305   | 3                                    | 4.9                     | −4.8                                    | −5.1                           |
| L305G  |                                      |                         |                                         |                                |
| L305P  |                                      |                         |                                         |                                |
| L305F  |                                      |                         |                                         |                                |
| L305A  | 4                                    | 4.7                     | −5.2                                    | −5.2                           |
| L305D  |                                      |                         |                                         |                                |
| L305E  |                                      |                         |                                         |                                |
| L305I  | 2                                    | 5                       | −3.7                                    | −3.7                           |
| L305M  | 3                                    | 3.9                     | −5.9                                    | −5.9                           |
| L305N  | 3                                    | 4.1                     | −5.7                                    | −6.2                           |
| L305Q  | 2                                    | 5.9                     | −0.2                                    | −0.2                           |

|       |   |     |      |      |
|-------|---|-----|------|------|
| L305R | 2 | 4.8 | −5.8 | −5.8 |
| L305S |   |     |      |      |
| L305V |   |     |      |      |
| L305W |   |     |      |      |
| L305Y | 3 | 3.8 | −5.5 | −5.5 |
| L305K |   |     |      |      |
| L305H | 3 | 3.4 | −5.5 | −5.5 |
| L305C |   |     |      |      |
| L305T |   |     |      |      |

**Table S22.** Analysis of the free binding energy from the PCI\_Lip WT and all exchanges at position L305 for the docking results of pNPV. The empty unit means that substrates couldn't be docked into the active pocket. Affinity at best position means the docking affinity at the minimum distance.

| Mutant | Number of meaningful docking results | Minimum distance<br>[Å] | Affinity at best position<br>[kcal/mol] | Highest affinity<br>[kcal/mol] |
|--------|--------------------------------------|-------------------------|-----------------------------------------|--------------------------------|
| L305   | 5                                    | 4.6                     | −5.1                                    | −5.1                           |
| L305G  |                                      |                         |                                         |                                |
| L305P  |                                      |                         |                                         |                                |
| L305F  |                                      |                         |                                         |                                |
| L305A  | 5                                    | 3.8                     | −6.8                                    | −6.8                           |
| L305D  |                                      |                         |                                         |                                |
| L305E  |                                      |                         |                                         |                                |
| L305I  | 1                                    | 5.6                     | −4.6                                    | −4.6                           |
| L305M  | 7                                    | 4.8                     | −4.8                                    | −5.6                           |
| L305N  | 5                                    | 3.9                     | −5                                      | −5                             |
| L305Q  |                                      |                         |                                         |                                |
| L305R  | 4                                    | 3.5                     | −4.9                                    | −4.9                           |
| L305S  |                                      |                         |                                         |                                |
| L305V  |                                      |                         |                                         |                                |
| L305W  |                                      |                         |                                         |                                |
| L305Y  | 3                                    | 4.6                     | −5                                      | −5.8                           |
| L305K  |                                      |                         |                                         |                                |
| L305H  | 3                                    | 4.6                     | −5                                      | −5                             |
| L305C  |                                      |                         |                                         |                                |
| L305T  |                                      |                         |                                         |                                |

**Table S23.** Analysis of the free binding energy from the PCI\_Lip WT and all exchanges at position L305 for the docking results of pNPH. The empty unit means that substrates couldn't be docked into the active pocket. Affinity at best position means the docking affinity at the minimum distance.

| Mutant | Number of meaningful docking results | Minimum distance<br>[Å] | Affinity at best position<br>[kcal/mol] | Highest affinity<br>[kcal/mol] |
|--------|--------------------------------------|-------------------------|-----------------------------------------|--------------------------------|
| L305   | 3                                    | 4.5                     | −5.8                                    | −5.9                           |
| L305G  |                                      |                         |                                         |                                |
| L305P  |                                      |                         |                                         |                                |
| L305F  |                                      |                         |                                         |                                |
| L305A  | 5                                    | 3.9                     | −6.1                                    | −6.1                           |
| L305D  |                                      |                         |                                         |                                |
| L305E  |                                      |                         |                                         |                                |
| L305I  | 1                                    | 6.5                     | −5.1                                    | −5.1                           |
| L305M  | 8                                    | 4.9                     | −5.4                                    | −5.7                           |
| L305N  | 7                                    | 4.3                     | −6                                      | −6.7                           |
| L305Q  |                                      |                         |                                         |                                |
| L305R  | 6                                    | 3.5                     | −5.7                                    | −5.8                           |
| L305S  |                                      |                         |                                         |                                |
| L305V  |                                      |                         |                                         |                                |
| L305W  |                                      |                         |                                         |                                |
| L305Y  | 2                                    | 4.5                     | −5.3                                    | −5.6                           |
| L305K  |                                      |                         |                                         |                                |
| L305H  | 3                                    | 4.8                     | −5.2                                    | −5.8                           |
| L305C  | 1                                    | 2.9                     | −3                                      | −3                             |
| L305T  |                                      |                         |                                         |                                |

**Table S24.** Analysis of the free binding energy from the PCI\_Lip WT and all exchanges at position L305 for the docking results of pNPO. The empty unit means that substrates couldn't be docked into the active pocket. Affinity at best position means the docking affinity at the minimum distance.

| Mutant | Number of meaningful docking results | Minimum distance<br>[Å] | Affinity at best position<br>[kcal/mol] | Highest affinity<br>[kcal/mol] |
|--------|--------------------------------------|-------------------------|-----------------------------------------|--------------------------------|
| L305   | 5                                    | 4.5                     | −5.8                                    | −5.9                           |
| L305G  | 2                                    | 6.5                     | −1.4                                    | −1.4                           |
| L305P  |                                      |                         |                                         |                                |
| L305F  |                                      |                         |                                         |                                |
| L305A  | 8                                    | 3.4                     | −5.6                                    | −6.2                           |
| L305D  |                                      |                         |                                         |                                |
| L305E  |                                      |                         |                                         |                                |
| L305I  | 6                                    | 5.9                     | −2.5                                    | −2.5                           |
| L305M  | 7                                    | 4.5                     | −6.1                                    | −6.2                           |
| L305N  | 5                                    | 4.2                     | −6.3                                    | −6.3                           |
| L305Q  |                                      |                         |                                         |                                |

|       |   |     |      |      |
|-------|---|-----|------|------|
| L305R | 5 | 3.4 | −6   | −6.1 |
| L305S |   |     |      |      |
| L305V |   |     |      |      |
| L305W |   |     |      |      |
| L305Y | 6 | 4.2 | −6.2 | −6.5 |
| L305K |   |     |      |      |
| L305H | 7 | 3.3 | −4.4 | −4.6 |
| L305C | 3 | 3   | 3.7  | 3.7  |
| L305T |   |     |      |      |

**Table S25.** Analysis of the free binding energy from the PCI\_Lip WT and all exchanges at position L305 for the docking results of pNPP. The empty unit means that substrates couldn't be docked into the active pocket. Affinity at best position means the docking affinity at the minimum distance.

| Mutant | Number of meaningful docking results | Minimum distance<br>[Å] | Affinity at best position<br>[kcal/mol] | Highest affinity<br>[kcal/mol] |
|--------|--------------------------------------|-------------------------|-----------------------------------------|--------------------------------|
| L305   | 6                                    | 4.3                     | −4.2                                    | −5.5                           |
| L305G  |                                      |                         |                                         |                                |
| L305P  |                                      |                         |                                         |                                |
| L305F  |                                      |                         |                                         |                                |
| L305A  |                                      |                         |                                         |                                |
| L305D  |                                      |                         |                                         |                                |
| L305E  |                                      |                         |                                         |                                |
| L305I  |                                      |                         |                                         |                                |
| L305M  | 4                                    | 4                       | −6.4                                    | −7.2                           |
| L305N  | 4                                    | 4.7                     | −6.7                                    | −7                             |
| L305Q  |                                      |                         |                                         |                                |
| L305R  | 4                                    | 3.7                     | −6.3                                    | −6.9                           |
| L305S  |                                      |                         |                                         |                                |
| L305V  |                                      |                         |                                         |                                |
| L305W  |                                      |                         |                                         |                                |
| L305Y  | 8                                    | 3.9                     | −6.8                                    | −7                             |
| L305K  |                                      |                         |                                         |                                |
| L305H  | 4                                    | 3.4                     | −6                                      | −6                             |
| L305C  | 1                                    | 4.3                     | 1.3                                     | 1.3                            |
| L305T  |                                      |                         |                                         |                                |



**Table S26.** Analysis of the free binding energy from the PCI\_Lip WT and all exchanges at position I529 for the docking results of pNPA. The empty unit means that substrates couldn't be docked into the active pocket. Affinity at best position means the docking affinity at the minimum distance.

| Mutant | Number of meaningful docking results | Minimum distance<br>[Å] | Affinity at best position<br>[kcal/mol] | Highest affinity<br>[kcal/mol] |
|--------|--------------------------------------|-------------------------|-----------------------------------------|--------------------------------|
| I529   | 2                                    | 5.1                     | −4.4                                    | −4.4                           |
| I529G  | 3                                    | 5.7                     | −6                                      | −6                             |
| I529P  |                                      |                         |                                         |                                |
| I529L  | 1                                    | 6.3                     | −5.4                                    | −5.4                           |
| I529A  | 5                                    | 4.2                     | −5                                      | −5.6                           |
| I529D  |                                      |                         |                                         |                                |
| I529E  | 1                                    | 4.8                     | −5.2                                    | −5.2                           |
| I529F  | 1                                    | 4.9                     | −3.2                                    | −3.2                           |
| I529M  |                                      |                         |                                         |                                |
| I529N  |                                      |                         |                                         |                                |
| I529Q  |                                      |                         |                                         |                                |
| I529R  |                                      |                         |                                         |                                |
| I529S  | 1                                    | 6.4                     | −5.3                                    | −5.3                           |
| I529V  |                                      |                         |                                         |                                |
| I529W  |                                      |                         |                                         |                                |
| I529Y  |                                      |                         |                                         |                                |
| I529K  | 2                                    | 5.2                     | −5.8                                    | −5.8                           |
| I529H  |                                      |                         |                                         |                                |
| I529C  | 4                                    | 5.4                     | −5.1                                    | −5.6                           |
| I529T  | 1                                    | 6                       | −4.9                                    | −4.9                           |

**Table S27.** Analysis of the free binding energy from the PCI\_Lip WT and all exchanges at position I529 for the docking results of pNPB. The empty unit means that substrates couldn't be docked into the active pocket. Affinity at best position means the docking affinity at the minimum distance.

| Mutant | Number of meaningful docking results | Minimum distance<br>[Å] | Affinity at best position<br>[kcal/mol] | Highest affinity<br>[kcal/mol] |
|--------|--------------------------------------|-------------------------|-----------------------------------------|--------------------------------|
| I529   | 3                                    | 4.9                     | −4.8                                    | −5.1                           |
| I529G  | 5                                    | 4                       | −5.8                                    | −6.5                           |
| I529P  |                                      |                         |                                         |                                |
| I529L  | 2                                    | 5.8                     | −5.5                                    | −6                             |
| I529A  | 6                                    | 4.9                     | −5.7                                    | −6.2                           |
| I529D  |                                      |                         |                                         |                                |
| I529E  | 5                                    | 4                       | −5.8                                    | −6.6                           |
| I529M  |                                      |                         |                                         |                                |
| I529N  |                                      |                         |                                         |                                |
| I529Q  |                                      |                         |                                         |                                |
| I529R  |                                      |                         |                                         |                                |

|       |   |     |      |      |
|-------|---|-----|------|------|
| I529S | 1 | 6.5 | −5.6 | −5.6 |
| I529V |   |     |      |      |
| I529W |   |     |      |      |
| I529Y | 1 | 5.9 | −4.3 | −4.3 |
| I529K | 4 | 4.9 | −6.3 | −6.3 |
| I529H |   |     |      |      |
| I529C | 4 | 4.9 | −5.9 | −6.9 |
| I529T | 1 | 5.1 | −5   | −5   |
| I529F |   |     |      |      |

**Table S28.** Analysis of the free binding energy from the PCI\_Lip WT and all exchanges at position I529 for the docking results of pNPV. The empty unit means that substrates couldn't be docked into the active pocket. Affinity at best position means the docking affinity at the minimum distance.

| Mutant | Number of meaningful docking results | Minimum distance<br>[Å]              | Affinity at best position<br>[kcal/mol] | Highest affinity<br>[kcal/mol] |
|--------|--------------------------------------|--------------------------------------|-----------------------------------------|--------------------------------|
| I529   | 5                                    | 4.6                                  | −5.1                                    | −5.1                           |
| I529G  | 4                                    | 3.4                                  | −5.9                                    | −6.7                           |
| I529P  |                                      |                                      |                                         |                                |
| I529L  | 5                                    | 4.9                                  | −3.9                                    | −5.8                           |
| I529A  | 7                                    | 4.5                                  | −5.7                                    | −6.2                           |
| I529D  |                                      |                                      |                                         |                                |
| I529E  | 8                                    | 4.2                                  | −6.1                                    | −6.8                           |
| I529M  |                                      |                                      |                                         |                                |
| I529N  |                                      |                                      |                                         |                                |
| I529Q  |                                      |                                      |                                         |                                |
| I529R  |                                      |                                      |                                         |                                |
| I529S  |                                      |                                      |                                         |                                |
| I529V  |                                      |                                      |                                         |                                |
| I529W  |                                      |                                      |                                         |                                |
| I529Y  | 1                                    | 5.5                                  | −4                                      | −6.2                           |
| I529K  |                                      |                                      |                                         |                                |
| I529H  |                                      |                                      |                                         |                                |
| I529C  | 3                                    | Affinity at best position [kcal/mol] | Highest affinity [kcal/mol]             | −7.1                           |
| I529T  | 2                                    | 5.3                                  | −5.5                                    | −5.9                           |
| I529F  |                                      |                                      |                                         |                                |

**Table S29.** Analysis of the free binding energy from the PCI\_Lip WT and all exchanges at position I529 for the docking results of pNPH. The empty unit means that substrates couldn't be docked into the active pocket. Affinity at best position means the docking affinity at the minimum distance.

| Mutant | Number of meaningful docking results | Minimum distance<br>[Å] | Affinity at best position<br>[kcal/mol] | Highest affinity<br>[kcal/mol] |
|--------|--------------------------------------|-------------------------|-----------------------------------------|--------------------------------|
| I529   | 3                                    | 4.5                     | −5.8                                    | −5.9                           |
| I529G  | 6                                    | 5.1                     | −5.9                                    | −7                             |
| I529P  |                                      |                         |                                         |                                |
| I529L  | 5                                    | 4.8                     | −3.6                                    | −6.1                           |
| I529A  | 8                                    | 3.3                     | −5.5                                    | −6.4                           |
| I529D  |                                      |                         |                                         |                                |
| I529E  | 7                                    | 4                       | −6.1                                    | −6.9                           |
| I529M  |                                      |                         |                                         |                                |
| I529N  |                                      |                         |                                         |                                |
| I529Q  |                                      |                         |                                         |                                |
| I529R  |                                      |                         |                                         |                                |
| I529S  | 1                                    | 6.3                     | −5.8                                    | −5.8                           |
| I529V  |                                      |                         |                                         |                                |
| I529W  |                                      |                         |                                         |                                |
| I529Y  | 1                                    | 5.9                     | −5.2                                    | −5.2                           |
| I529K  | 4                                    | 4.9                     | −6.2                                    | −6.2                           |
| I529H  |                                      |                         |                                         |                                |
| I529C  | 2                                    | 5.7                     | −7.2                                    | −7.2                           |
| I529T  | 2                                    | 5.3                     | −5.4                                    | −5.4                           |
| I529F  |                                      |                         |                                         |                                |

**Table S30.** Analysis of the free binding energy from the PCI\_Lip WT and all exchanges at position I529 for the docking results of pNPO. The empty unit means that substrates couldn't be docked into the active pocket. Affinity at best position means the docking affinity at the minimum distance.

| Mutant | Number of meaningful docking results | Minimum distance<br>[Å] | Affinity at best position<br>[kcal/mol] | Highest affinity<br>[kcal/mol] |
|--------|--------------------------------------|-------------------------|-----------------------------------------|--------------------------------|
| I529   | 5                                    | 4.5                     | −5.8                                    | −5.9                           |
| I529G  | 6                                    | 3.9                     | −6.2                                    | −7.2                           |
| I529P  | 4                                    | 4.2                     | −5.6                                    | −5.6                           |
| I529L  | 7                                    | 3.1                     | −2.2                                    | −5.3                           |
| I529A  | 4                                    | 4.3                     | −6.6                                    | −6.6                           |
| I529D  |                                      |                         |                                         |                                |
| I529E  | 5                                    | 5                       | −5.7                                    | −6.9                           |
| I529I  | 6                                    | 4.6                     | −5.6                                    | −6.4                           |
| I529M  |                                      |                         |                                         |                                |
| I529N  |                                      |                         |                                         |                                |
| I529Q  |                                      |                         |                                         |                                |

|       |   |     |      |      |
|-------|---|-----|------|------|
| I529R | 2 | 6.1 | −5   | −5.4 |
| I529S | 1 | 5.7 | −5.8 | −5.8 |
| I529V |   |     |      |      |
| I529W |   |     |      |      |
| I529Y | 2 | 5.6 | −4.2 | −5.3 |
| I529K | 6 | 4.9 | −6.3 | −6.3 |
| I529H |   |     |      |      |
| I529C | 2 | 5.3 | −7.1 | −7.6 |
| I529T | 1 | 5.3 | −6.8 | −6.8 |

**Table S31.** Analysis of the free binding energy from the PCI\_Lip WT and all exchanges at position I529 for the docking results of pNPP. The empty unit means that substrates couldn't be docked into the active pocket. Affinity at best position means the docking affinity at the minimum distance.

| Mutant | Number of meaningful docking results | Minimum distance<br>[Å] | Affinity at best position<br>[kcal/mol] | Highest affinity<br>[kcal/mol] |
|--------|--------------------------------------|-------------------------|-----------------------------------------|--------------------------------|
| I529   | 6                                    | 4.3                     | −4.2                                    | −5.5                           |
| I529G  | 8                                    | 5.7                     | −7.6                                    | −7.6                           |
| I529P  |                                      |                         |                                         |                                |
| I529L  | 6                                    | 3.2                     | −2.3                                    | −6.1                           |
| I529A  | 7                                    | 3.4                     | −5.2                                    | −6.3                           |
| I529D  |                                      |                         |                                         |                                |
| I529E  | 10                                   | 3.8                     | −6.8                                    | −7.5                           |
| I529M  |                                      |                         |                                         |                                |
| I529N  |                                      |                         |                                         |                                |
| I529Q  |                                      |                         |                                         |                                |
| I529R  | 5                                    | 4.1                     | −4.1                                    | −5.9                           |
| I529S  |                                      |                         |                                         |                                |
| I529V  |                                      |                         |                                         |                                |
| I529W  |                                      |                         |                                         |                                |
| I529Y  | 5                                    | 5.8                     | −6.5                                    | −6.8                           |
| I529K  | 7                                    | 5.1                     | −6.7                                    | −6.7                           |
| I529H  |                                      |                         |                                         |                                |
| I529C  | 3                                    | 5                       | −6.7                                    | −8.1                           |
| I529T  | 2                                    | 5.3                     | −6.8                                    | −6.8                           |
| I529F  |                                      |                         |                                         |                                |

**Table S32.** Analysis of the free binding energy from the PCI\_Lip WT and all exchanges at position S163 for the docking results of pNPA. The empty unit means that substrates couldn't be docked into the active pocket. Affinity at best position means the docking affinity at the minimum distance.

| Mutant | Number of meaningful docking results | Minimum distance<br>[Å] | Affinity at best position<br>[kcal/mol] | Highest affinity<br>[kcal/mol] |
|--------|--------------------------------------|-------------------------|-----------------------------------------|--------------------------------|
| S163   | 2                                    | 5.1                     | −4.4                                    | −4.4                           |
| S163G  |                                      |                         |                                         |                                |
| S163P  | 1                                    | 4.9                     | −4.5                                    | −4.5                           |
| S163L  |                                      |                         |                                         |                                |
| S163A  |                                      |                         |                                         |                                |
| S163D  |                                      |                         |                                         |                                |
| S163E  | 4                                    | 5.3                     | −5                                      | −5.6                           |
| S163I  |                                      |                         |                                         |                                |
| S163M  | 2                                    | 4.7                     | −5                                      | −5.6                           |
| S163N  |                                      |                         |                                         |                                |
| S163Q  | 2                                    | 4.3                     | −4.9                                    | −4.9                           |
| S163R  | 1                                    | 4                       | −1.4                                    | −1.4                           |
| S163F  |                                      |                         |                                         |                                |
| S163V  | 2                                    | 3.4                     | −5.9                                    | −5.9                           |
| S163W  | 1                                    | 5.7                     | −3.9                                    | −3.9                           |
| S163Y  | 1                                    | 5.7                     | −5.1                                    | −5.1                           |
| S163K  | 2                                    | 6.2                     | −4.4                                    | −4.4                           |
| S163H  | 4                                    | 4.2                     | −4.7                                    | −6                             |
| S163C  |                                      |                         |                                         |                                |
| S163T  |                                      |                         |                                         |                                |

**Table S33.** Analysis of the free binding energy from the PCI\_Lip WT and all exchanges at position S163 for the docking results of pNPB. The empty unit means that substrates couldn't be docked into the active pocket. Affinity at best position means the docking affinity at the minimum distance.

| Mutant | Number of meaningful docking results | Minimum distance<br>[Å] | Affinity at best position<br>[kcal/mol] | Highest affinity<br>[kcal/mol] |
|--------|--------------------------------------|-------------------------|-----------------------------------------|--------------------------------|
| S163   | 3                                    | 4.9                     | −4.8                                    | −5.1                           |
| S163G  |                                      |                         |                                         |                                |
| S163P  | 3                                    | 4.7                     | −4.3                                    | −4.4                           |
| S163L  |                                      |                         |                                         |                                |
| S163A  |                                      |                         |                                         |                                |
| S163D  |                                      |                         |                                         |                                |
| S163E  | 3                                    | 4                       | −5.6                                    | −5.6                           |
| S163I  |                                      |                         |                                         |                                |
| S163M  | 4                                    | 4.5                     | −5.3                                    | −6                             |
| S163N  |                                      |                         |                                         |                                |
| S163Q  | 3                                    | 4                       | −5.2                                    | −5.2                           |

|       |   |     |      |      |
|-------|---|-----|------|------|
| S163R |   |     |      |      |
| S163V | 1 | 5.9 | −1.9 | −1.9 |
| S163W | 6 | 3.4 | −6.2 | −6.2 |
| S163Y |   |     |      |      |
| S163K | 2 | 5.6 | −5.2 | −5.2 |
| S163H | 4 | 5.9 | −3.6 | −4.1 |
| S163C | 9 | 3.7 | −4.8 | −6.7 |
| S163T | 1 | 6.4 | −3.2 | −3.2 |
| S163F | 1 | 3.7 | −2.2 | −2.2 |

**Table S34.** Analysis of the free binding energy from the PCI\_Lip WT and all exchanges at position S163 for the docking results of pNPV. The empty unit means that substrates couldn't be docked into the active pocket. Affinity at best position means the docking affinity at the minimum distance.

| Mutant | Number of meaningful docking results | Minimum distance<br>[Å] | Affinity at best position<br>[kcal/mol] | Highest affinity<br>[kcal/mol] |
|--------|--------------------------------------|-------------------------|-----------------------------------------|--------------------------------|
| S163   | 5                                    | 4.6                     | −5.1                                    | −5.1                           |
| S163G  |                                      |                         |                                         |                                |
| S163P  | 4                                    | 3.4                     | −5                                      | −5                             |
| S163L  |                                      |                         |                                         |                                |
| S163A  | 2                                    | 4.5                     | −5.2                                    | −5.2                           |
| S163D  |                                      |                         |                                         |                                |
| S163E  | 2                                    | 6                       | −5.7                                    | −5.9                           |
| S163I  | 1                                    | 6.3                     | −5.7                                    | −5.7                           |
| S163M  | 6                                    | 4.2                     | −5.9                                    | −6.1                           |
| S163N  |                                      |                         |                                         |                                |
| S163Q  | 2                                    | 4.7                     | −5.6                                    | −5.6                           |
| S163R  |                                      |                         |                                         |                                |
| S163V  | 2                                    | 5.5                     | −2.1                                    | −2.2                           |
| S163W  | 1                                    | 5.8                     | −5.3                                    | −5.3                           |
| S163Y  |                                      |                         |                                         |                                |
| S163K  |                                      |                         |                                         |                                |
| S163H  | 1                                    | 6.3                     | −2.9                                    | −2.9                           |
| S163C  | 5                                    | 3.8                     | −5.7                                    | −6.8                           |
| S163T  |                                      |                         |                                         |                                |
| S163F  | 1                                    | 6                       | −3                                      | −3                             |

**Table S35.** Analysis of the free binding energy from the PCI\_Lip WT and all exchanges at position S163 for the docking results of pNPH. The empty unit means that substrates couldn't be docked into the active pocket. Affinity at best position means the docking affinity at the minimum distance.

| Mutant | Number of meaningful docking results | Minimum distance<br>[Å] | Affinity at best position<br>[kcal/mol] | Highest affinity<br>[kcal/mol] |
|--------|--------------------------------------|-------------------------|-----------------------------------------|--------------------------------|
| S163   | 3                                    | 4.5                     | −5.8                                    | −5.9                           |
| S163G  |                                      |                         |                                         |                                |
| S163P  | 4                                    | 3.3                     | −3.9                                    | −5.2                           |
| S163L  |                                      |                         |                                         |                                |
| S163A  |                                      |                         |                                         |                                |
| S163D  |                                      |                         |                                         |                                |
| S163E  | 2                                    | 4.7                     | −6                                      | −6.1                           |
| S163I  |                                      |                         |                                         |                                |
| S163M  | 9                                    | 4                       | −5.5                                    | −6                             |
| S163N  |                                      |                         |                                         |                                |
| S163Q  | 3                                    | 4.4                     | −5.8                                    | −5.8                           |
| S163R  |                                      |                         |                                         |                                |
| S163V  |                                      |                         |                                         |                                |
| S163W  | 3                                    | 3.5                     | −5.5                                    | −5.9                           |
| S163Y  | 2                                    | 5.6                     | −4.9                                    | −4.9                           |
| S163K  |                                      |                         |                                         |                                |
| S163H  | 3                                    | 3.5                     | −4.9                                    | −5.6                           |
| S163C  | 9                                    | 4.2                     | −5.5                                    | −7.1                           |
| S163T  | 1                                    | 6.3                     | −3.6                                    | −3.6                           |
| S163F  |                                      |                         |                                         |                                |

**Table S36.** Analysis of the free binding energy from the PCI\_Lip WT and all exchanges at position S163 for the docking results of pNPO. The empty unit means that substrates couldn't be docked into the active pocket. Affinity at best position means the docking affinity at the minimum distance.

| Mutant | Number of meaningful docking results | Minimum distance<br>[Å] | Affinity at best position<br>[kcal/mol] | Highest affinity<br>[kcal/mol] |
|--------|--------------------------------------|-------------------------|-----------------------------------------|--------------------------------|
| S163   | 5                                    | 4.5                     | −5.8                                    | −5.9                           |
| S163G  |                                      |                         |                                         |                                |
| S163P  | 4                                    | 3.2                     | −4.3                                    | −5.4                           |
| S163L  |                                      |                         |                                         |                                |
| S163A  | 1                                    | 4.5                     | −5.2                                    | −5.2                           |
| S163D  | 2                                    | 6.3                     | −5.7                                    | −6.2                           |
| S163E  | 7                                    | 4.2                     | −5.9                                    | −6.5                           |
| S163I  |                                      |                         |                                         |                                |
| S163M  | 5                                    | 4.6                     | −5.8                                    | −6.2                           |
| S163N  |                                      |                         |                                         |                                |
| S163Q  | 1                                    | 5.9                     | −6.1                                    | −6.1                           |

|       |   |     |      |      |
|-------|---|-----|------|------|
| S163R |   |     |      |      |
| S163V | 1 | 5.6 | −1.1 | −1.1 |
| S163W | 2 | 3.8 | −6.4 | −6.4 |
| S163Y | 1 | 4.4 | −5.1 | −5.1 |
| S163K |   |     |      |      |
| S163H | 2 | 3.6 | −5.2 | −5.2 |
| S163C | 6 | 3.8 | −5.5 | −7   |
| S163T |   |     |      |      |
| S163F | 2 | 4.5 | −2.9 | −2.9 |

**Table S37.** Analysis of the free binding energy from the PCI\_Lip WT and all exchanges at position S163 for the docking results of pNPP. The empty unit means that substrates couldn't be docked into the active pocket. Affinity at best position means the docking affinity at the minimum distance.

| Mutant | Number of meaningful docking results | Minimum distance<br>[Å] | Affinity at best position<br>[kcal/mol] | Highest affinity<br>[kcal/mol] |
|--------|--------------------------------------|-------------------------|-----------------------------------------|--------------------------------|
| S163   | 6                                    | 4.3                     | −4.2                                    | −5.5                           |
| S163G  |                                      |                         |                                         |                                |
| S163P  |                                      |                         |                                         |                                |
| S163L  |                                      |                         |                                         |                                |
| S163A  |                                      |                         |                                         |                                |
| S163D  | 3                                    | 3.4                     | −7                                      | −7                             |
| S163E  | 3                                    | 4                       | −7.2                                    | −7.2                           |
| S163I  | 1                                    | 4.2                     | −5                                      | −5                             |
| S163M  | 7                                    | 4.4                     | −6                                      | −6.6                           |
| S163N  |                                      |                         |                                         |                                |
| S163Q  | 8                                    | 3.7                     | −6.5                                    | −6.5                           |
| S163R  |                                      |                         |                                         |                                |
| S163V  | 3                                    | 4.8                     | 1.6                                     | 0.7                            |
| S163W  | 2                                    | 3.4                     | −6.5                                    | −6.5                           |
| S163Y  | 3                                    | 5                       | −2.4                                    | −5.3                           |
| S163K  | 1                                    | 6.4                     | −3.7                                    | −3.7                           |
| S163H  | 4                                    | 3.4                     | −2.8                                    | −3.7                           |
| S163C  | 9                                    | 3.7                     | −6.6                                    | −7.1                           |
| S163T  | 3                                    | 3.2                     | −4.4                                    | −4.4                           |
| S163F  | 2                                    | 5.2                     | −2.7                                    | −2.7                           |



**Table S38.** Analysis of the free binding energy from the PCI\_Lip WT and all exchanges at position I245 for the docking results of pNPA. The empty unit means that substrates couldn't be docked into the active pocket. Affinity at best position means the docking affinity at the minimum distance.

| Mutant | Number of meaningful docking results | Minimum distance<br>[Å] | Affinity at best position<br>[kcal/mol] | Highest affinity<br>[kcal/mol] |
|--------|--------------------------------------|-------------------------|-----------------------------------------|--------------------------------|
| I245   | 2                                    | 5.1                     | −4.4                                    | −4.4                           |
| I245G  |                                      |                         |                                         |                                |
| I245P  |                                      |                         |                                         |                                |
| I245L  | 7                                    | 3.9                     | −5.8                                    | −5.8                           |
| I245A  |                                      |                         |                                         |                                |
| I245D  | 6                                    | 3.8                     | −4.3                                    | −6                             |
| I245E  |                                      |                         |                                         |                                |
| I245M  | 1                                    | 6.3                     | −5.3                                    | −5.3                           |
| I245N  |                                      |                         |                                         |                                |
| I245Q  | 6                                    | 3.4                     | −5.3                                    | −5.6                           |
| I245R  | 1                                    | 3.6                     | −5.4                                    | −5.4                           |
| I245S  |                                      |                         |                                         |                                |
| I245V  |                                      |                         |                                         |                                |
| I245W  |                                      |                         |                                         |                                |
| I245Y  |                                      |                         |                                         |                                |
| I245K  | 1                                    | 5.7                     | −5.2                                    | −5.2                           |
| I245H  | 3                                    | 3.8                     | −5.6                                    | −5.6                           |
| I245C  |                                      |                         |                                         |                                |
| I245T  | 1                                    | 6.5                     | −4.9                                    | −4.9                           |
| I245F  | 3                                    | 5.2                     | −5.5                                    | −5.5                           |

**Table S39.** Analysis of the free binding energy from the PCI\_Lip WT and all exchanges at position I245 for the docking results of pNPB. The empty unit means that substrates couldn't be docked into the active pocket. Affinity at best position means the docking affinity at the minimum distance.

| Mutant | Number of meaningful docking results | Minimum distance<br>[Å] | Affinity at best position<br>[kcal/mol] | Highest affinity<br>[kcal/mol] |
|--------|--------------------------------------|-------------------------|-----------------------------------------|--------------------------------|
| I245   | 3                                    | 4.9                     | −4.8                                    | −5.1                           |
| I245G  |                                      |                         |                                         |                                |
| I245P  |                                      |                         |                                         |                                |
| I245L  | 11                                   | 3.8                     | −5.7                                    | −6.1                           |
| I245A  | 1                                    | 5.8                     | −5.5                                    | −6.1                           |
| I245D  | 5                                    | 5                       | −5.8                                    | −6.3                           |
| I245E  |                                      |                         |                                         |                                |
| I245M  | 2                                    | 4.6                     | −5.5                                    | −5.8                           |
| I245N  |                                      |                         |                                         |                                |
| I245Q  | 8                                    | 3.4                     | −5.6                                    | −5.9                           |
| I245R  | 4                                    | 3                       | −5.3                                    | −6.1                           |

|       |   |     |      |      |
|-------|---|-----|------|------|
| I245S |   |     |      |      |
| I245V |   |     |      |      |
| I245W |   |     |      |      |
| I245Y |   |     |      |      |
| I245K | 5 | 3.2 | −5.3 | −5.6 |
| I245H | 5 | 4   | −5.8 | −5.8 |
| I245C |   |     |      |      |
| I245T | 4 | 4.1 | −5.5 | −5.7 |
| I245F | 6 | 3.9 | −5.5 | −6   |

**Table S40.** Analysis of the free binding energy from the PCI\_Lip WT and all exchanges at position I245 for the docking results of pNPV. The empty unit means that substrates couldn't be docked into the active pocket. Affinity at best position means the docking affinity at the minimum distance.

| Mutant | Number of meaningful docking results | Minimum distance<br>[Å] | Affinity at best position<br>[kcal/mol] | Highest affinity<br>[kcal/mol] |
|--------|--------------------------------------|-------------------------|-----------------------------------------|--------------------------------|
| I245   | 5                                    | 4.6                     | −5.1                                    | −5.1                           |
| I245G  |                                      |                         |                                         |                                |
| I245P  |                                      |                         |                                         |                                |
| I245L  | 15                                   | 3.7                     | −5.6                                    | −5.8                           |
| I245A  | 2                                    | 5.8                     | −5.4                                    | −5.6                           |
| I245D  | 6                                    | 4.7                     | −6                                      | −6.2                           |
| I245E  |                                      |                         |                                         |                                |
| I245M  |                                      |                         |                                         |                                |
| I245N  |                                      |                         |                                         |                                |
| I245Q  | 12                                   | 3.3                     | −6                                      | −6                             |
| I245R  | 3                                    | 3.5                     | −6.2                                    | −6.5                           |
| I245S  |                                      |                         |                                         |                                |
| I245V  |                                      |                         |                                         |                                |
| I245W  |                                      |                         |                                         |                                |
| I245Y  |                                      |                         |                                         |                                |
| I245K  | 2                                    | 4.6                     | −6.2                                    | −6.2                           |
| I245H  | 3                                    | 5.1                     | −5.9                                    | −6.1                           |
| I245C  |                                      |                         |                                         |                                |
| I245T  | 3                                    | 4.9                     | −5.3                                    | −5.7                           |
| I245F  | 4                                    | 4.4                     | −5.5                                    | −5.6                           |

**Table S41.** Analysis of the free binding energy from the PCI\_Lip WT and all exchanges at position I245 for the docking results of pNPH. The empty unit means that substrates couldn't be docked into the active pocket. Affinity at best position means the docking affinity at the minimum distance.

| Mutant | Number of meaningful docking results | Minimum distance<br>[Å] | Affinity at best position<br>[kcal/mol] | Highest affinity<br>[kcal/mol] |
|--------|--------------------------------------|-------------------------|-----------------------------------------|--------------------------------|
| I245   | 3                                    | 4.5                     | −5.8                                    | −5.9                           |
| I245G  |                                      |                         |                                         |                                |
| I245P  |                                      |                         |                                         |                                |
| I245L  | 10                                   | 3.9                     | −6.2                                    | −6.4                           |
| I245A  | 1                                    | 6                       | −5.9                                    | −5.9                           |
| I245D  | 4                                    | 4.6                     | −5.4                                    | −6.3                           |
| I245E  |                                      |                         |                                         |                                |
| I245M  |                                      |                         |                                         |                                |
| I245N  |                                      |                         |                                         |                                |
| I245Q  | 12                                   | 3.3                     | −6.3                                    | −6.3                           |
| I245R  | 2                                    | 4                       | −5.9                                    | −5.9                           |
| I245S  |                                      |                         |                                         |                                |
| I245V  |                                      |                         |                                         |                                |
| I245W  |                                      |                         |                                         |                                |
| I245Y  |                                      |                         |                                         |                                |
| I245K  | 3                                    | 3.4                     | −5.9                                    | −6                             |
| I245H  | 7                                    | 3.9                     | −5.8                                    | −6.4                           |
| I245C  |                                      |                         |                                         |                                |
| I245T  | 3                                    | 4.9                     | −5.6                                    | −6.1                           |
| I245F  | 3                                    | 4.9                     | −6.1                                    | −6.1                           |

**Table S42.** Analysis of the free binding energy from the PCI\_Lip WT and all exchanges at position I245 for the docking results of pNPO. The empty unit means that substrates couldn't be docked into the active pocket. Affinity at best position means the docking affinity at the minimum distance.

| Mutant | Number of meaningful docking results | Minimum distance<br>[Å] | Affinity at best position<br>[kcal/mol] | Highest affinity<br>[kcal/mol] |
|--------|--------------------------------------|-------------------------|-----------------------------------------|--------------------------------|
| I245   | 5                                    | 4.5                     | −5.8                                    | −5.9                           |
| I245G  |                                      |                         |                                         |                                |
| I245P  |                                      |                         |                                         |                                |
| I245L  | 10                                   | 4                       | −6                                      | −6.4                           |
| I245A  | 1                                    | 5.9                     | −5.8                                    | −5.8                           |
| I245D  | 8                                    | 4.3                     | −5                                      | −6                             |
| I245E  | 1                                    | 6.4                     | −2.6                                    | −2.6                           |
| I245M  | 4                                    | 4.1                     | −5.6                                    | −6                             |
| I245N  |                                      |                         |                                         |                                |
| I245Q  | 12                                   | 3.2                     | −5.5                                    | −6.4                           |
| I245R  | 4                                    | 3                       | −6.4                                    | −6.9                           |

|       |   |     |      |      |
|-------|---|-----|------|------|
| I245S |   |     |      |      |
| I245V |   |     |      |      |
| I245W |   |     |      |      |
| I245Y |   |     |      |      |
| I245K |   |     |      |      |
| I245H | 7 | 3.9 | −6   | −6.4 |
| I245C |   |     |      |      |
| I245T | 2 | 5.7 | −5.6 | −5.6 |
| I245F | 4 | 4.7 | −5.8 | −5.9 |

**Table S43.** Analysis of the free binding energy from the PCI\_Lip WT and all exchanges at position I245 for the docking results of pNPP. The empty unit means that substrates couldn't be docked into the active pocket. Affinity at best position means the docking affinity at the minimum distance.

| Mutant | Number of meaningful docking results | Minimum distance<br>[Å] | Affinity at best position<br>[kcal/mol] | Highest affinity<br>[kcal/mol] |
|--------|--------------------------------------|-------------------------|-----------------------------------------|--------------------------------|
| I245   | 6                                    | 4.3                     | −4.2                                    | −5.5                           |
| I245G  |                                      |                         |                                         |                                |
| I245P  |                                      |                         |                                         |                                |
| I245L  | 11                                   | 3.8                     | −6.6                                    | −7.1                           |
| I245A  | 11                                   | 4.6                     | −5.9                                    | −7.1                           |
| I245D  | 3                                    | 4.7                     | −6.9                                    | −6.9                           |
| I245E  | 2                                    | 4.7                     | −1.5                                    | −4.3                           |
| I245M  | 2                                    | 4.1                     | −5.9                                    | −6.1                           |
| I245N  |                                      |                         |                                         |                                |
| I245Q  | 10                                   | 3.3                     | −7                                      | −7                             |
| I245R  | 2                                    | 3.5                     | −7.4                                    | −7.4                           |
| I245S  |                                      |                         |                                         |                                |
| I245V  |                                      |                         |                                         |                                |
| I245W  |                                      |                         |                                         |                                |
| I245Y  |                                      |                         |                                         |                                |
| I245K  | 1                                    | 5.7                     | −6.4                                    | −6.4                           |
| I245H  | 7                                    | 4.8                     | −6.1                                    | −6.4                           |
| I245C  |                                      |                         |                                         |                                |
| I245T  | 3                                    | 3.9                     | −6.3                                    | −6.3                           |
| I245F  | 10                                   | 3.5                     | −6.2                                    | −6.7                           |

**Table S44.** Analysis of the free binding energy from the PCI\_Lip WT and all exchanges at position F129 for the docking results of pNPA. The empty unit means that substrates couldn't be docked into the active pocket. Affinity at best position means the docking affinity at the minimum distance.

| Mutant | Number of meaningful docking results | Minimum distance<br>[Å] | Affinity at best position<br>[kcal/mol] | Highest affinity<br>[kcal/mol] |
|--------|--------------------------------------|-------------------------|-----------------------------------------|--------------------------------|
| F129   | 2                                    | 5.1                     | −4.4                                    | −4.4                           |
| F129G  |                                      |                         |                                         |                                |
| F129P  |                                      |                         |                                         |                                |
| F129L  | 1                                    | 3.3                     | −3.3                                    | −3.3                           |
| F129A  | 1                                    | 5.5                     | −5                                      | −5                             |
| F129D  |                                      |                         |                                         |                                |
| F129E  | 2                                    | 6.3                     | −5.5                                    | −5.5                           |
| F129I  |                                      |                         |                                         |                                |
| F129M  | 6                                    | 3.1                     | −5.3                                    | −6.1                           |
| F129N  |                                      |                         |                                         |                                |
| F129Q  | 6                                    | 3.5                     | −6.3                                    | −6.3                           |
| F129R  | 3                                    | 3.3                     | −5.9                                    | −5.9                           |
| F129S  |                                      |                         |                                         |                                |
| F129V  |                                      |                         |                                         |                                |
| F129W  |                                      |                         |                                         |                                |
| F129Y  |                                      |                         |                                         |                                |
| F129K  | 3                                    | 3.8                     | −0.4                                    | −1.8                           |
| F129H  | 2                                    | 5.6                     | −5.3                                    | −5.3                           |
| F129C  | 2                                    | 4                       | −4.7                                    | −4.9                           |
| F129T  |                                      |                         |                                         |                                |

**Table S45.** Analysis of the free binding energy from the PCI\_Lip WT and all exchanges at position F129 for the docking results of pNPB. The empty unit means that substrates couldn't be docked into the active pocket. Affinity at best position means the docking affinity at the minimum distance.

| Mutant | Number of meaningful docking results | Minimum distance<br>[Å] | Affinity at best position<br>[kcal/mol] | Highest affinity<br>[kcal/mol] |
|--------|--------------------------------------|-------------------------|-----------------------------------------|--------------------------------|
| F129   | 3                                    | 4.9                     | −4.8                                    | −5.1                           |
| F129G  |                                      |                         |                                         |                                |
| F129P  |                                      |                         |                                         |                                |
| F129L  | 1                                    | 3.8                     | −3.6                                    | −3.6                           |
| F129A  | 4                                    | 4.6                     | −5.1                                    | −5.4                           |
| F129D  |                                      |                         |                                         |                                |
| F129E  | 1                                    | 6.2                     | −6.2                                    | −6.2                           |
| F129I  |                                      |                         |                                         |                                |
| F129M  | 6                                    | 3                       | −5.6                                    | −6.5                           |
| F129N  |                                      |                         |                                         |                                |
| F129Q  | 5                                    | 3.5                     | −6.4                                    | −6.4                           |

|       |   |     |      |      |
|-------|---|-----|------|------|
| F129R | 2 | 4.2 | −6.2 | −6.2 |
| F129S |   |     |      |      |
| F129V |   |     |      |      |
| F129W |   |     |      |      |
| F129Y |   |     |      |      |
| F129K | 3 | 3.4 | −0.7 | −0.6 |
| F129H | 3 | 4   | −5.7 | −5.8 |
| F129C | 3 | 4.5 | −4.9 | −5.6 |
| F129T |   |     |      |      |

**Table S46.** Analysis of the free binding energy from the PCI\_Lip WT and all exchanges at position F129 for the docking results of pNPV. The empty unit means that substrates couldn't be docked into the active pocket. Affinity at best position means the docking affinity at the minimum distance.

| Mutant | Number of meaningful docking results | Minimum distance<br>[Å] | Affinity at best position<br>[kcal/mol] | Highest affinity<br>[kcal/mol] |
|--------|--------------------------------------|-------------------------|-----------------------------------------|--------------------------------|
| F129   | 5                                    | 4.6                     | −5.1                                    | −5.1                           |
| F129G  |                                      |                         |                                         |                                |
| F129P  |                                      |                         |                                         |                                |
| F129L  |                                      |                         |                                         |                                |
| F129A  | 11                                   | 3.9                     | −5.6                                    | −5.9                           |
| F129D  |                                      |                         |                                         |                                |
| F129E  | 3                                    | 6.1                     | −5.9                                    | −5.9                           |
| F129I  |                                      |                         |                                         |                                |
| F129M  | 6                                    | 3.4                     | −3.7                                    | −6.8                           |
| F129N  |                                      |                         |                                         |                                |
| F129Q  | 6                                    | 3.5                     | −6.7                                    | −6.7                           |
| F129R  | 5                                    | 3.3                     | −6.1                                    | −6.2                           |
| F129S  |                                      |                         |                                         |                                |
| F129V  |                                      |                         |                                         |                                |
| F129W  |                                      |                         |                                         |                                |
| F129Y  |                                      |                         |                                         |                                |
| F129K  | 4                                    | 3                       | −0.2                                    | −0.6                           |
| F129H  | 1                                    | 4                       | −5.8                                    | −5.8                           |
| F129C  | 3                                    | 3.9                     | −5.9                                    | −5.9                           |
| F129T  |                                      |                         |                                         |                                |

**Table S47.** Analysis of the free binding energy from the PCI\_Lip WT and all exchanges at position F129 for the docking results of pNPH. The empty unit means that substrates couldn't be docked into the active pocket. Affinity at best position means the docking affinity at the minimum distance.

| Mutant | Number of meaningful docking results | Minimum distance<br>[Å] | Affinity at best position<br>[kcal/mol] | Highest affinity<br>[kcal/mol] |
|--------|--------------------------------------|-------------------------|-----------------------------------------|--------------------------------|
| F129   | 3                                    | 4.5                     | −5.8                                    | −5.9                           |
| F129G  |                                      |                         |                                         |                                |
| F129P  |                                      |                         |                                         |                                |
| F129L  |                                      |                         |                                         |                                |
| F129A  | 8                                    | 3.8                     | −5.7                                    | −5.8                           |
| F129D  |                                      |                         |                                         |                                |
| F129E  | 1                                    | 6                       | −5.5                                    | −5.5                           |
| F129I  |                                      |                         |                                         |                                |
| F129M  | 7                                    | 3.5                     | −3.9                                    | −6.9                           |
| F129N  |                                      |                         |                                         |                                |
| F129Q  | 7                                    | 3.4                     | −6.9                                    | −6.9                           |
| F129R  | 4                                    | 3.2                     | −6.5                                    | −6.7                           |
| F129S  |                                      |                         |                                         |                                |
| F129V  |                                      |                         |                                         |                                |
| F129W  |                                      |                         |                                         |                                |
| F129Y  |                                      |                         |                                         |                                |
| F129K  | 4                                    | 3                       | −0.2                                    | −0.2                           |
| F129H  | 3                                    | 4                       | −6                                      | −6.1                           |
| F129C  | 4                                    | 3.8                     | −6                                      | −6                             |
| F129T  |                                      |                         |                                         |                                |

**Table S48.** Analysis of the free binding energy from the PCI\_Lip WT and all exchanges at position F129 for the docking results of pNPO. The empty unit means that substrates couldn't be docked into the active pocket. Affinity at best position means the docking affinity at the minimum distance.

| Mutant | Number of meaningful docking results | Minimum distance<br>[Å] | Affinity at best position<br>[kcal/mol] | Highest affinity<br>[kcal/mol] |
|--------|--------------------------------------|-------------------------|-----------------------------------------|--------------------------------|
| F129   | 5                                    | 4.5                     | −5.8                                    | −5.9                           |
| F129G  |                                      |                         |                                         |                                |
| F129P  |                                      |                         |                                         |                                |
| F129L  |                                      |                         |                                         |                                |
| F129A  | 6                                    | 3.7                     | −6.4                                    | −6.4                           |
| F129D  |                                      |                         |                                         |                                |
| F129E  | 3                                    | 3.5                     | −3.1                                    | −5.2                           |
| F129I  |                                      |                         |                                         |                                |
| F129M  | 5                                    | 4.4                     | −7                                      | −7.1                           |
| F129N  |                                      |                         |                                         |                                |
| F129Q  | 8                                    | 3.5                     | −7.3                                    | −7.3                           |

|       |   |     |      |      |
|-------|---|-----|------|------|
| F129R | 7 | 3.5 | −7.1 | −7.1 |
| F129S |   |     |      |      |
| F129V |   |     |      |      |
| F129W |   |     |      |      |
| F129Y |   |     |      |      |
| F129K |   |     |      |      |
| F129H | 4 | 5   | −6.4 | −6.9 |
| F129C | 7 | 3   | −3.9 | −6.3 |
| F129T |   |     |      |      |

**Table S49.** Analysis of the free binding energy from the PCI\_Lip WT and all exchanges at position F129 for the docking results of pNPP. The empty unit means that substrates couldn't be docked into the active pocket. Affinity at best position means the docking affinity at the minimum distance.

| Mutant | Number of meaningful docking results | Minimum distance<br>[Å] | Affinity at best position<br>[kcal/mol] | Highest affinity<br>[kcal/mol] |
|--------|--------------------------------------|-------------------------|-----------------------------------------|--------------------------------|
| F129   | 6                                    | 4.3                     | −4.2                                    | −5.5                           |
| F129G  |                                      |                         |                                         |                                |
| F129P  |                                      |                         |                                         |                                |
| F129L  | 1                                    | 3.1                     | −3.4                                    | −3.4                           |
| F129A  | 9                                    | 4                       | −6.9                                    | −7                             |
| F129D  |                                      |                         |                                         |                                |
| F129E  | 1                                    | 5.6                     | −5.1                                    | −5.1                           |
| F129I  |                                      |                         |                                         |                                |
| F129M  | 2                                    | 3                       | −3.1                                    | −3.1                           |
| F129N  |                                      |                         |                                         |                                |
| F129Q  | 5                                    | 4                       | −5.6                                    | −7.4                           |
| F129R  | 6                                    | 3.2                     | −7.1                                    | −7.1                           |
| F129S  |                                      |                         |                                         |                                |
| F129V  |                                      |                         |                                         |                                |
| F129W  |                                      |                         |                                         |                                |
| F129Y  |                                      |                         |                                         |                                |
| F129K  |                                      |                         |                                         |                                |
| F129H  | 12                                   | 3.3                     | −7.4                                    | −7.8                           |
| F129C  | 10                                   | 3                       | −4.4                                    | −6.7                           |
| F129T  |                                      |                         |                                         |                                |



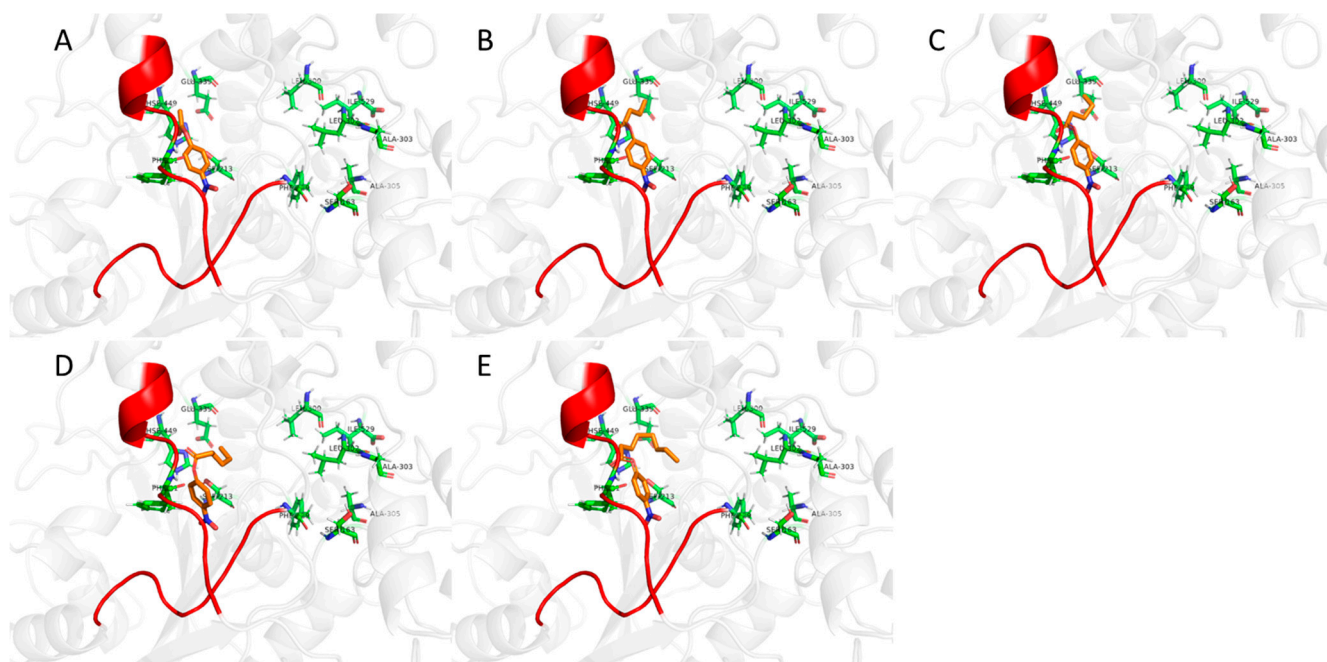

**Figure S6.** Docking of different chain length *p*-nitrophenol (pNP) esters inside the L305A mutant of the PCI\_Lip. Only the best docking results are shown. The criteria of a meaningful docking result is the distance of the S213 towards the carboxyl carbon atom, which were set to be <5.1 Å for pNPA, 4.9 Å for pNPB, 4.6 Å for pNPV, 4.5 Å for pNPH, 4.5 Å for pNPPO Å and 4.3 Å for pNPP. The carbon atoms of the protein are colored in green, the nitrogen atoms are blue and the oxygen atoms are colored in red. The carbon atoms of the *p*-nitrophenol (pNP) esters are colored in orange. (A) pNP-acetate (pNPA), (B) pNP-butyrates (pNPB), (C) pNP-valerate (pNPV), (D) pNP-hexanoate (pNPH) and (E) pNP-octanoate (pNPPO). HSE = prototropic tautomer of histidine, H on N2 in the histidine ring, according to the CHARMM force field.

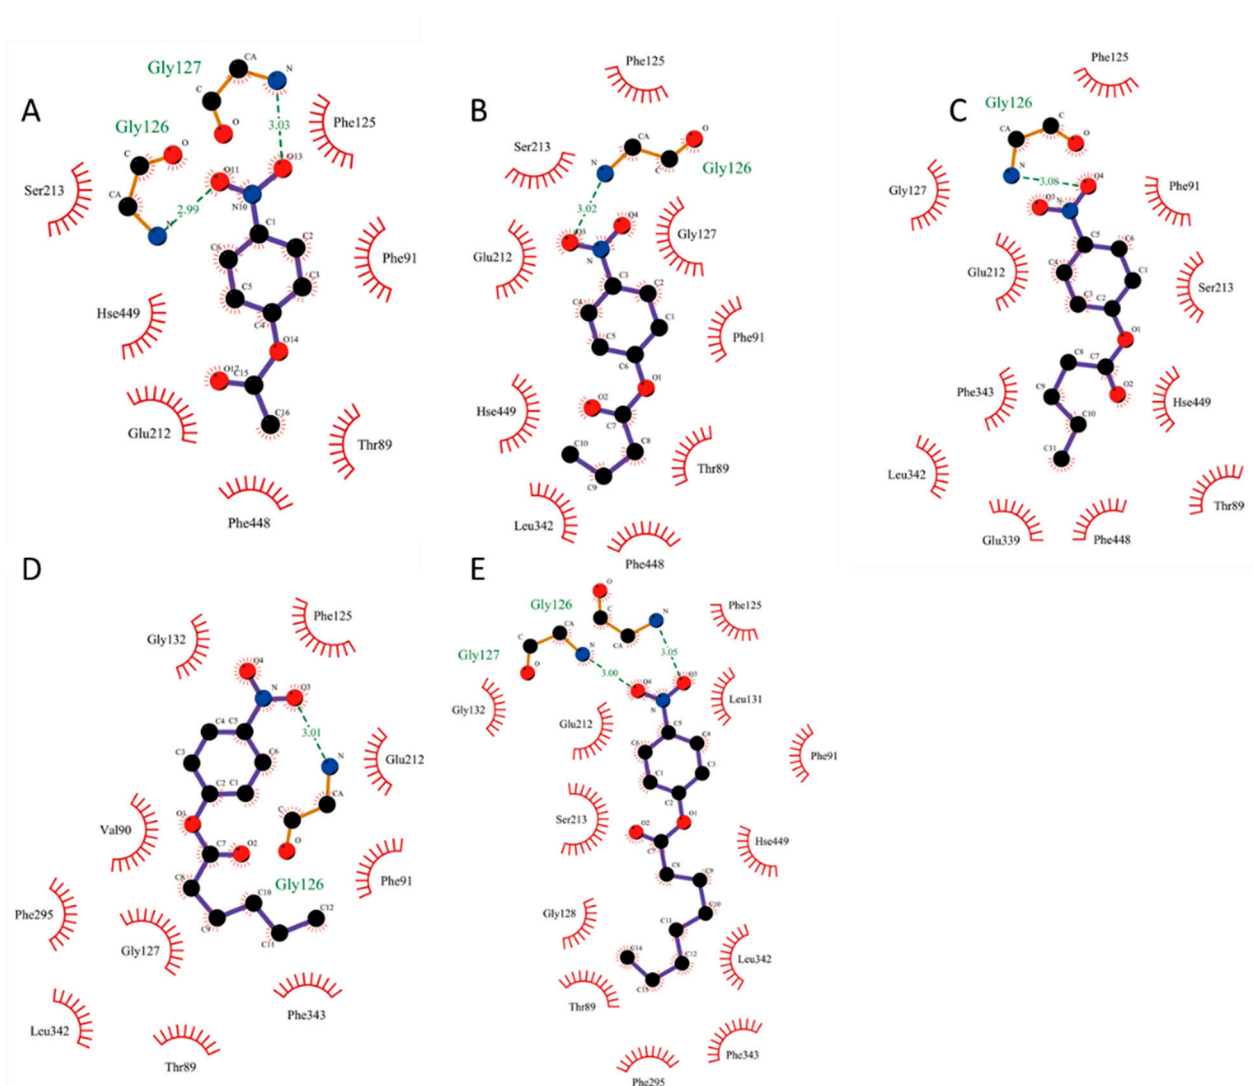

**Figure S7.** 2D pattern analysis of the docking of different chain length *p*-nitrophenol (pNP) esters inside the L305A mutant of the PCI\_Lip generated by using the software LigPlot. Only the best docking results are shown. The residues of the protein which are in the interacting distance are marked with red half circles. The carbon atoms of the *p*-nitrophenol (pNP) esters are colored in black and the bonds in magenta, the nitrogen atoms are blue and the oxygen atoms are colored in red. (A) pNP-acetate (pNPA), (B) pNP-butyrate (pNPB), (C) pNP-valerate (pNPV), (D) pNP-hexanoate (pNPH) and (E) pNP-octanoate (pNPO). HSE = prototropic tautomer of histidine, H on N2 in the histidine ring, according to the CHARMM force field.

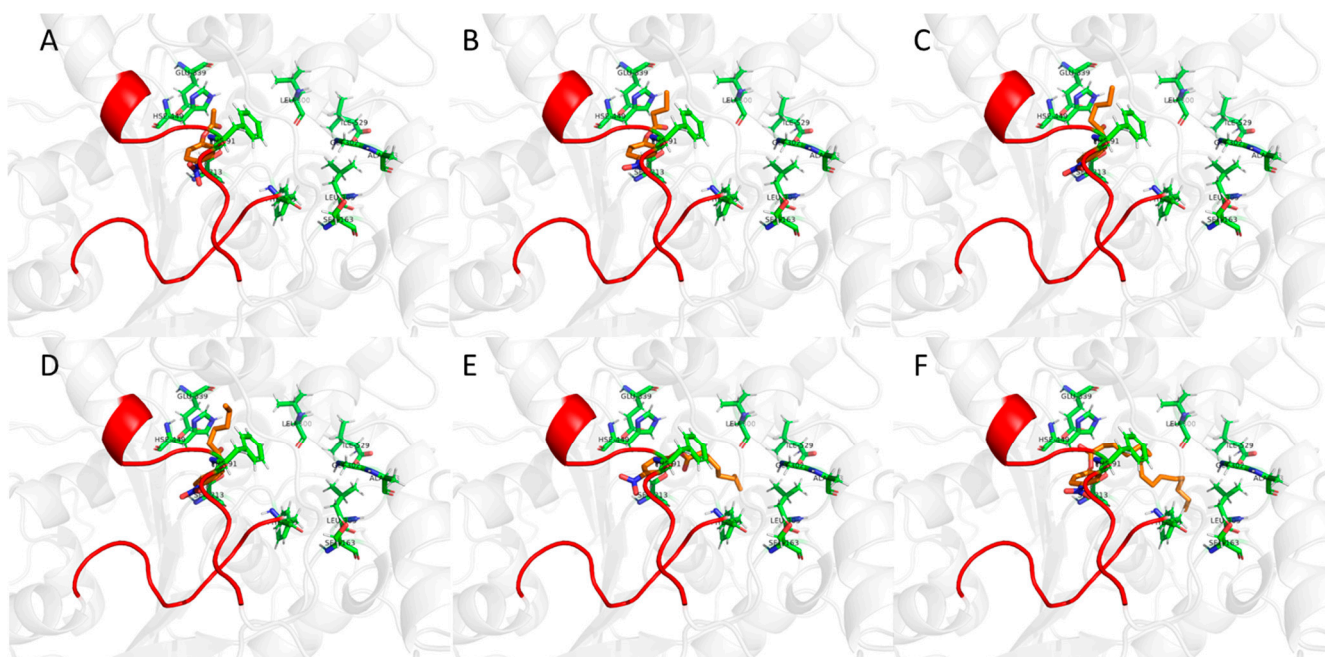

**Figure S8.** Docking of different chain length *p*-nitrophenol (pNP) esters inside the L302G mutant of the PCI\_Lip. Only the best docking results are shown. The criteria of a meaningful docking result is the distance of the S213 towards the carboxyl carbon atom, which were set to be <5.1 Å for pNPA, 4.9 Å for pNPB, 4.6 Å for pNPV, 4.5 Å for pNPH, 4.5 Å for pNPO Å and 4.3 Å for pNPP. The carbon atoms of the protein are colored in green, the nitrogen atoms are blue and the oxygen atoms are colored in red. The carbon atoms of the *p*-nitrophenol (pNP) esters are colored in orange. (A) pNP-acetate (pNPA), (B) pNP-butyrates (pNPB), (C) pNP-valerate (pNPV), (D) pNP-hexanoate (pNPH), (E) pNP-octanoate (pNPO), and (F) pNP-palmitate (pNPP). HSE = prototropic tautomer of histidine, H on N2 in the histidine ring, according to the CHARMM force field.

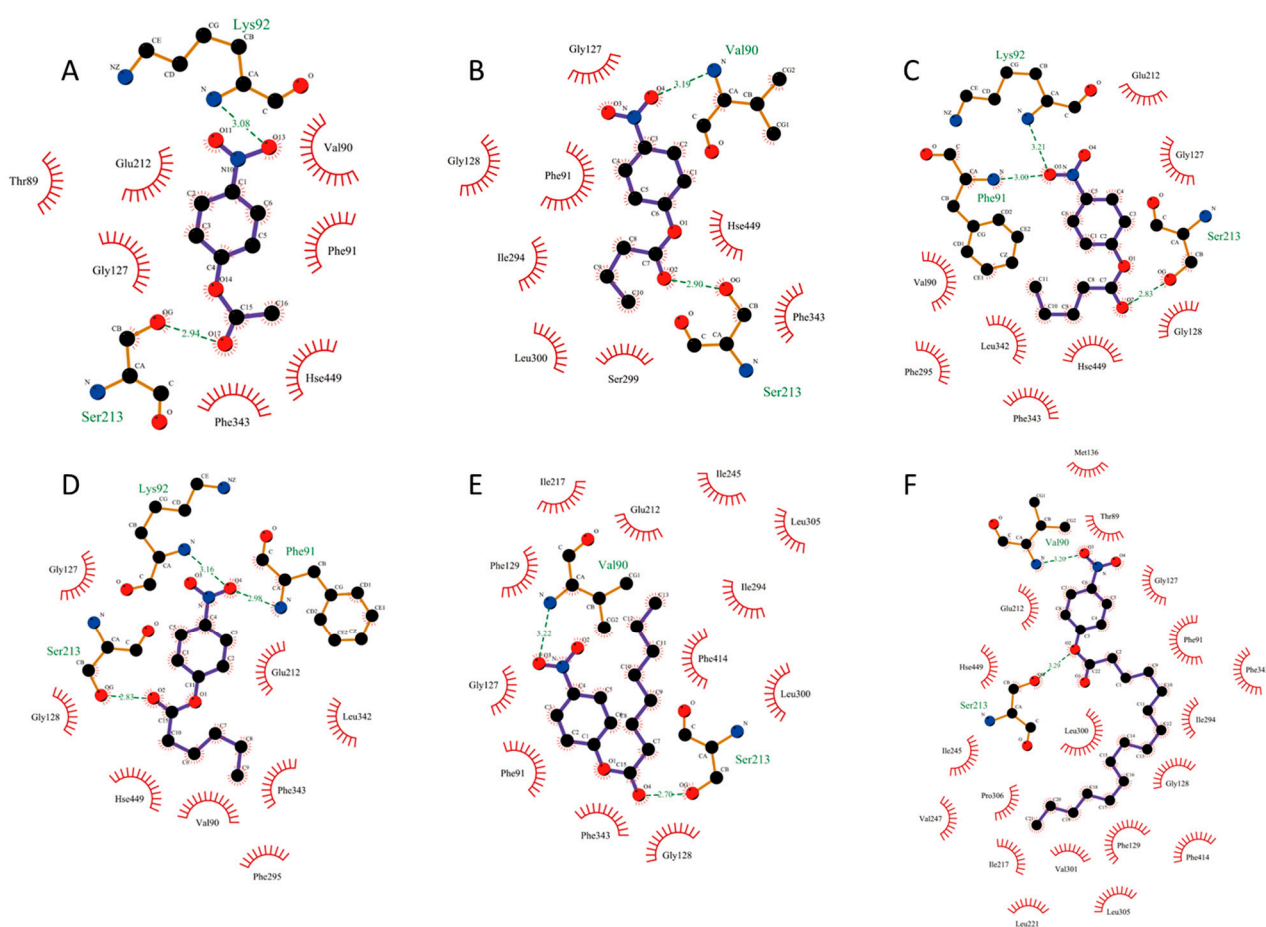

**Figure S9.** 2D pattern analysis of the docking of different chain length *p*-nitrophenol (pNP) esters inside the L302G mutant of the PCI\_Lip generated by using the software LigPlotT. Only the best docking results are shown. The residues of the protein which are in the interacting distance are marked with red half circles. The carbon atoms of the *p*-nitrophenol (pNP) esters are colored in black and the bonds in magenta, the nitrogen atoms are blue and the oxygen atoms are colored in red. (A) pNP-acetate (pNPA), (B) pNP-butyrates (pNPB), (C) pNP-valerate (pNPV), (D) pNP-hexanoate (pNPH), (E) pNP-octanoate (pNPO), and (F) pNP-palmitate (pNPP). HSE = prototropic tautomer of histidine, H on N2 in the histidine ring, according to the CHARMM force field.

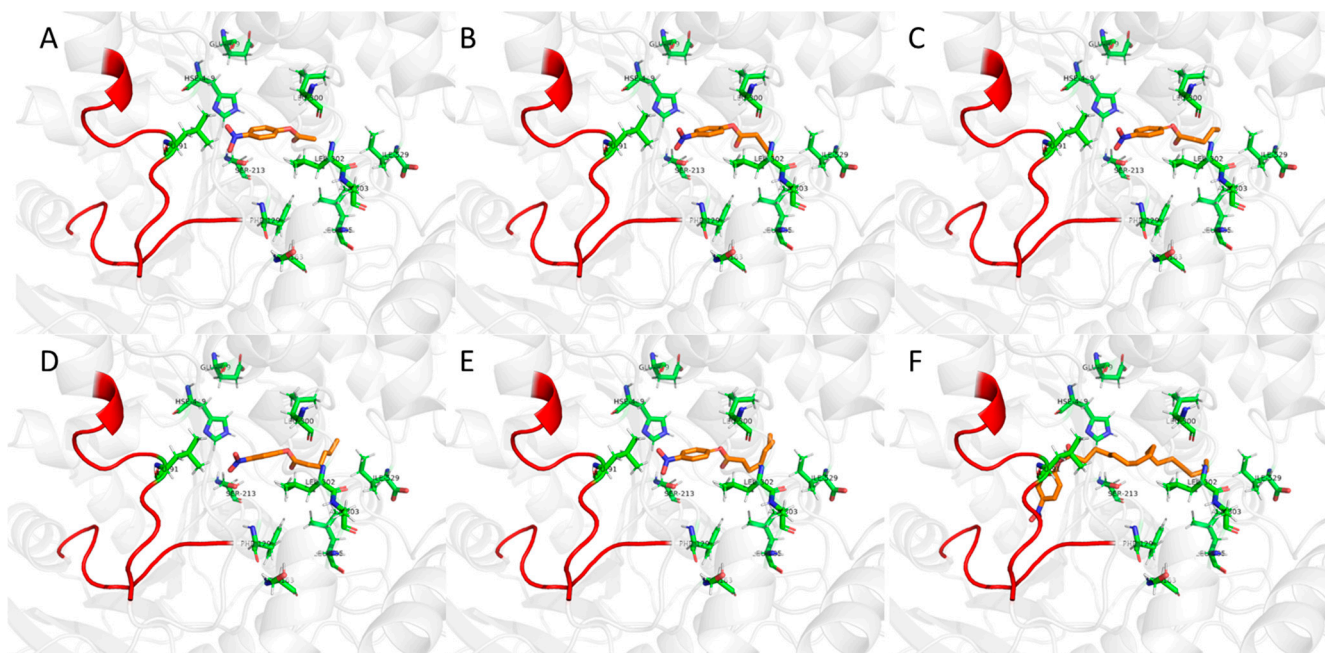

**Figure S10.** Docking of different chain length *p*-nitrophenol (pNP) esters inside the F91L mutant of the PCI\_Lip. Only the best docking results are shown. The criteria of a meaningful docking result is the distance of the S213 towards the carboxyl carbon atom, which were set to be <5.1 Å for pNPA, 4.9 Å for pNPB, 4.6 Å for pNPV, 4.5 Å for pNPH, 4.5 Å for pNPO Å and 4.3 Å for pNPP. The carbon atoms of the protein are colored in green, the nitrogen atoms are blue and the oxygen atoms are colored in red. The carbon atoms of the *p*-nitrophenol (pNP) esters are colored in orange. (A) pNP-acetate (pNPA), (B) pNP-butyrate (pNPB), (C) pNP-valerate (pNPV), (D) pNP-hexanoate (pNPH), (E) pNP-octanoate (pNPO), and (F) pNP-palmitate (pNPP). HSE = prototropic tautomer of histidine, H on N2 in the histidine ring, according to the CHARMM force field.



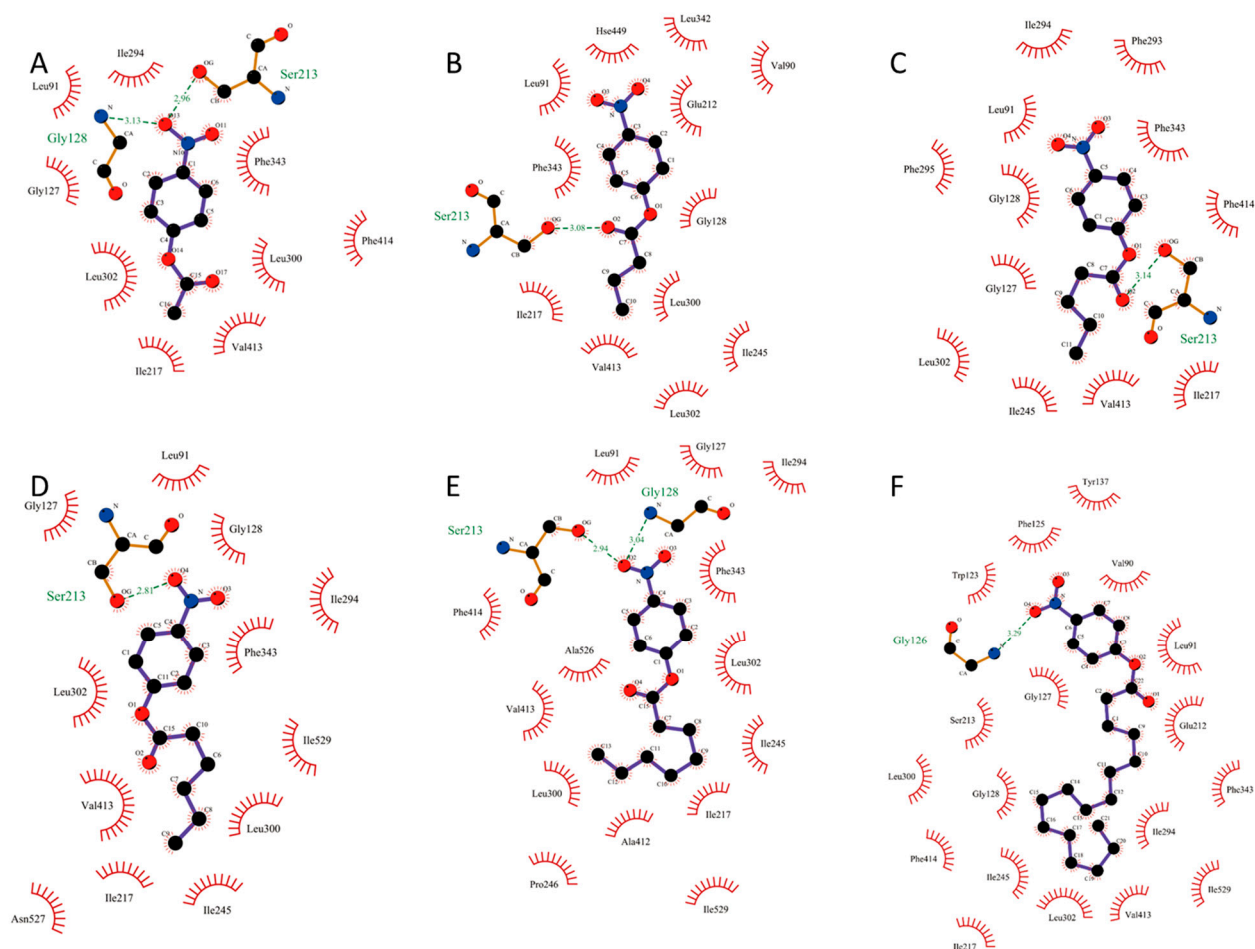

**Figure S11.** 2D pattern analysis of the docking of different chain length *p*-nitrophenol (pNP) esters inside the F91L mutant of the PCI\_Lip generated by using the software LigPlot. Only the best docking results are shown. The residues of the protein which are in the interacting distance are marked with red half circles. The carbon atoms of the *p*-nitrophenol (pNP) esters are colored in black and the bonds in magenta, the nitrogen atoms are blue and the oxygen atoms are colored in red. (A) pNP-acetate (pNPA), (B) pNP-butyrate (pNPB), (C) pNP-valerate (pNPV), (D) pNP-hexanoate (pNPH), (E) pNP-octanoate (pNPO), and (F) pNP-palmitate (pNPP).

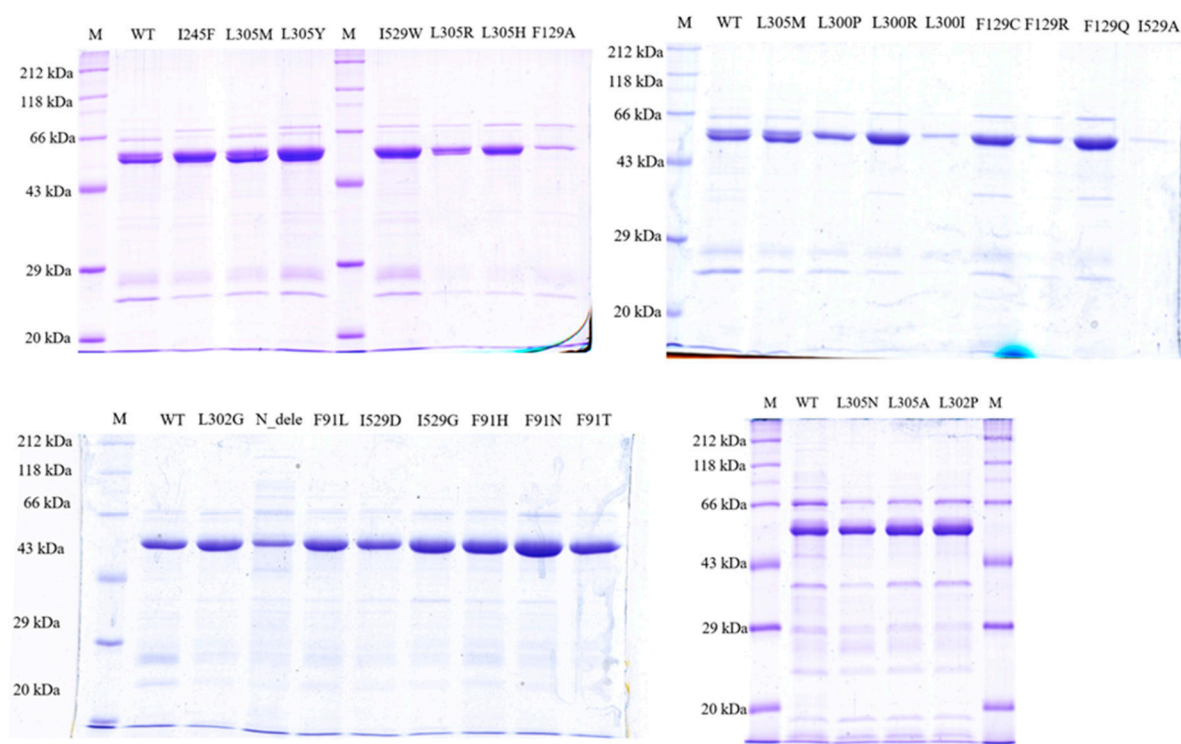

**Figure S12.** Denaturing SDS-PAGE gels of the IMAC fractions of all expressed PCI\_Lip mutants.

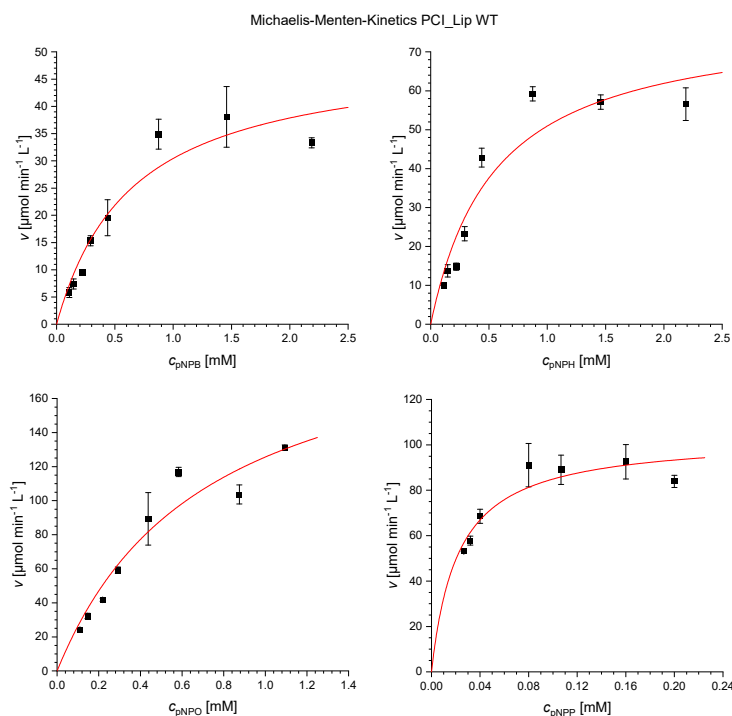

**Figure S13.** Saturation curves of PCI\_Lip WT against selected pNP-Esters (pNPB, pNPH, pNPO and pNPP). Obtained data for the activity were fitted via OriginPro® 2021 based on the Michaelis-Menten equation. In case of pNPB, pNPH and pNPO saturation was not achieved due to a limited solubility of these substrates under the assay conditions. Activity at all concentrations were measured in triplicates and the error bars correspond to standard deviation.

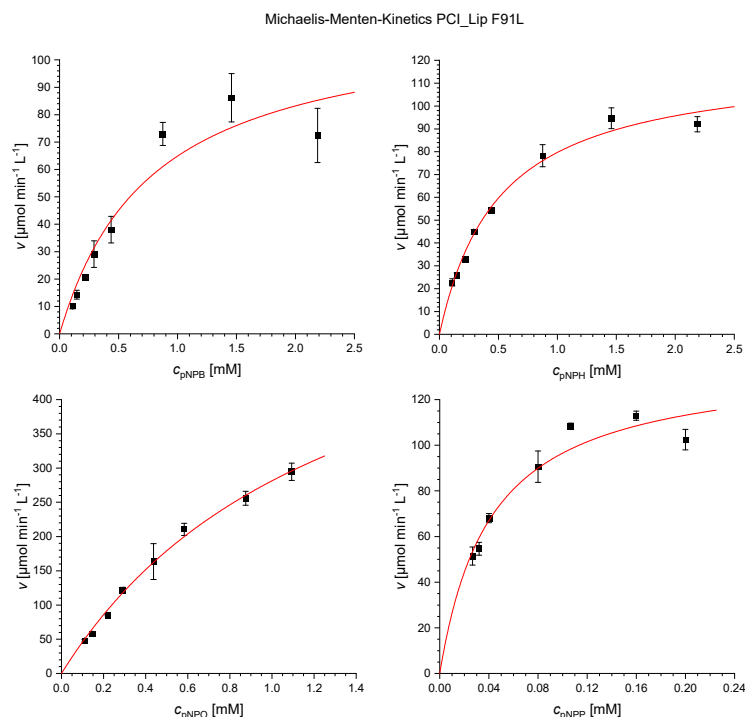

**Figure S14.** Saturation curves of PCI\_Lip mutant F91L against selected pNP-Esters (pNPB, pNPH, pNPO and pNPP). Obtained data for the activity were fitted via OriginPro® 2021 based on the Michaelis-Menten equation. In case of pNPB, pNPH and pNPO saturation was not achieved due to a limited solubility of these substrates under the assay conditions. Activity at all concentrations were measured in triplicates and the error bars correspond to standard deviation.

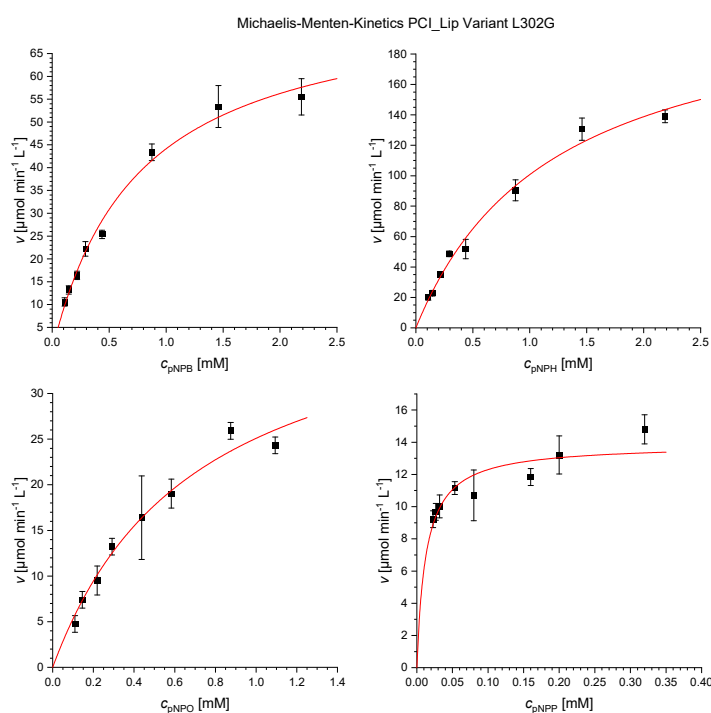

**Figure S15.** Saturation curves of PCI\_Lip mutant L302G against selected pNP-Esters (pNPB, pNPH, pNPO and pNPP). Obtained data for the activity were fitted via OriginPro® 2021 based on the



Michaelis-Menten equation. In case of pNPB, pNPH and pNPO saturation was not achieved due to a limited solubility of these substrates under the assay conditions. Activity at all concentrations were measured in triplicates and the error bars correspond to standard deviation.

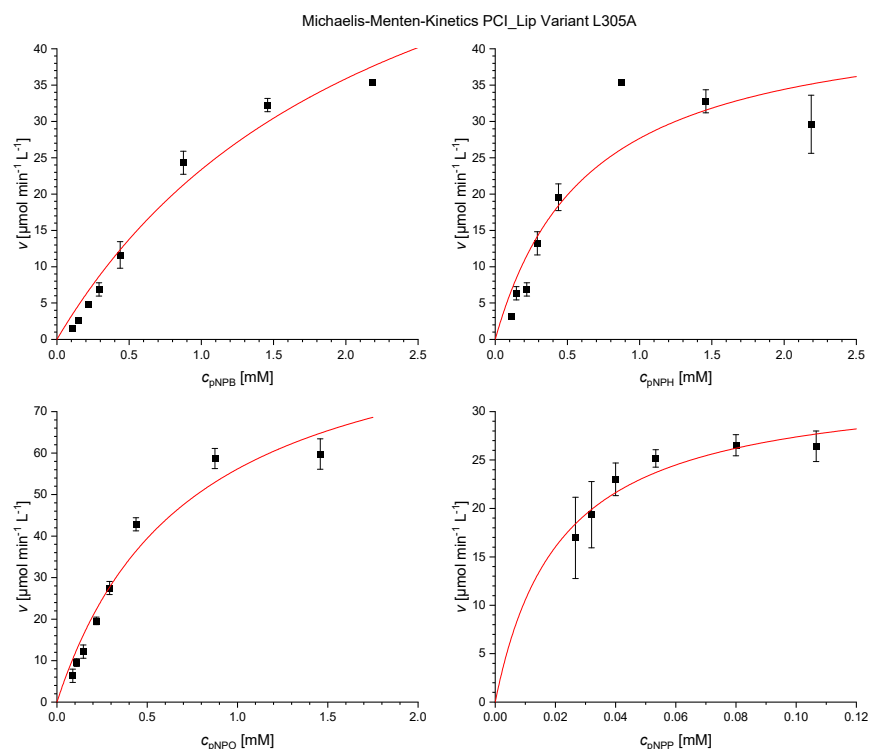

**Figure S16.** Saturation curves of PCI\_Lip mutant L305A against selected pNP-Esters (pNPB, pNPH, pNPO and pNPP). Obtained data for the activity were fitted via OriginPro® 2021 based on the Michaelis-Menten equation. In case of pNPB, pNPH and pNPO saturation was not achieved due to a limited solubility of these substrates under the assay conditions. Activity at all concentrations were measured in triplicates and the error bars correspond to standard deviation.

**Table 50.** Calculated  $T_{50}^{60}$  values and errors for the PCI\_Lip WT, F91L, L302G and L305A.

|       | $T_{50}^{60}$ [°C] |
|-------|--------------------|
| WT    | $31.5 \pm 0.7$     |
| F91L  | $29.8 \pm 3.2$     |
| L302G | $32.9 \pm 1.1$     |
| L305A | $33.5 \pm 0.5$     |

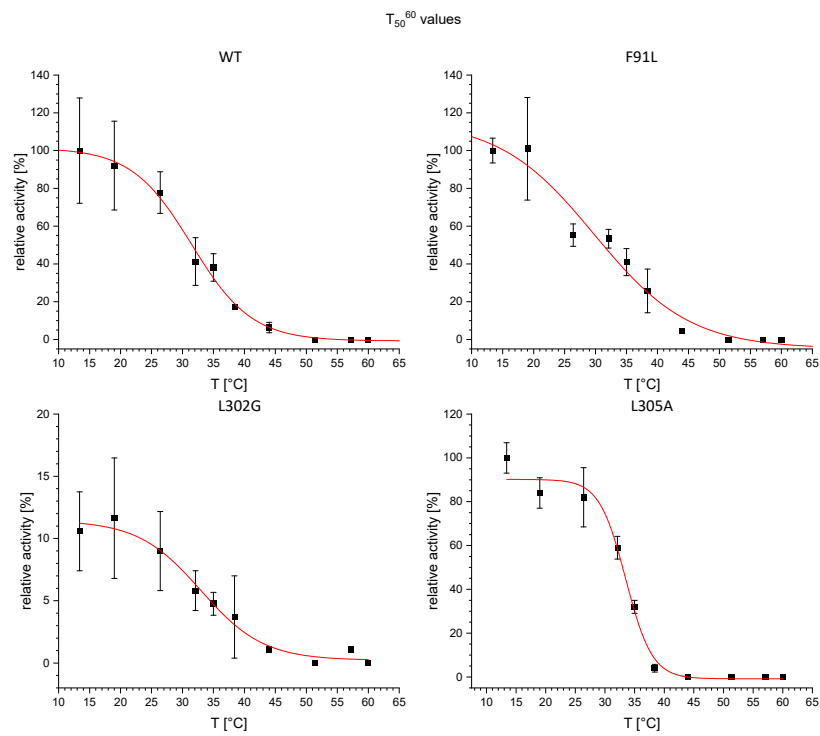

**Figure S17.** Activities of PCI\_Lip WT and mutants F91L, L302G and L305A after incubation for 1 h at different temperatures against pNPO. The activity data was fitted via OriginPro® 2021 using a Boltzman-fit. The turning point of the fitted curve represents the  $T_{50}^{60}$  value of the respective PCI\_Lip mutant. The  $T_{50}^{60}$  value represents the temperature where after a treatment of 1 h 50% of the enzymes activity is lost.

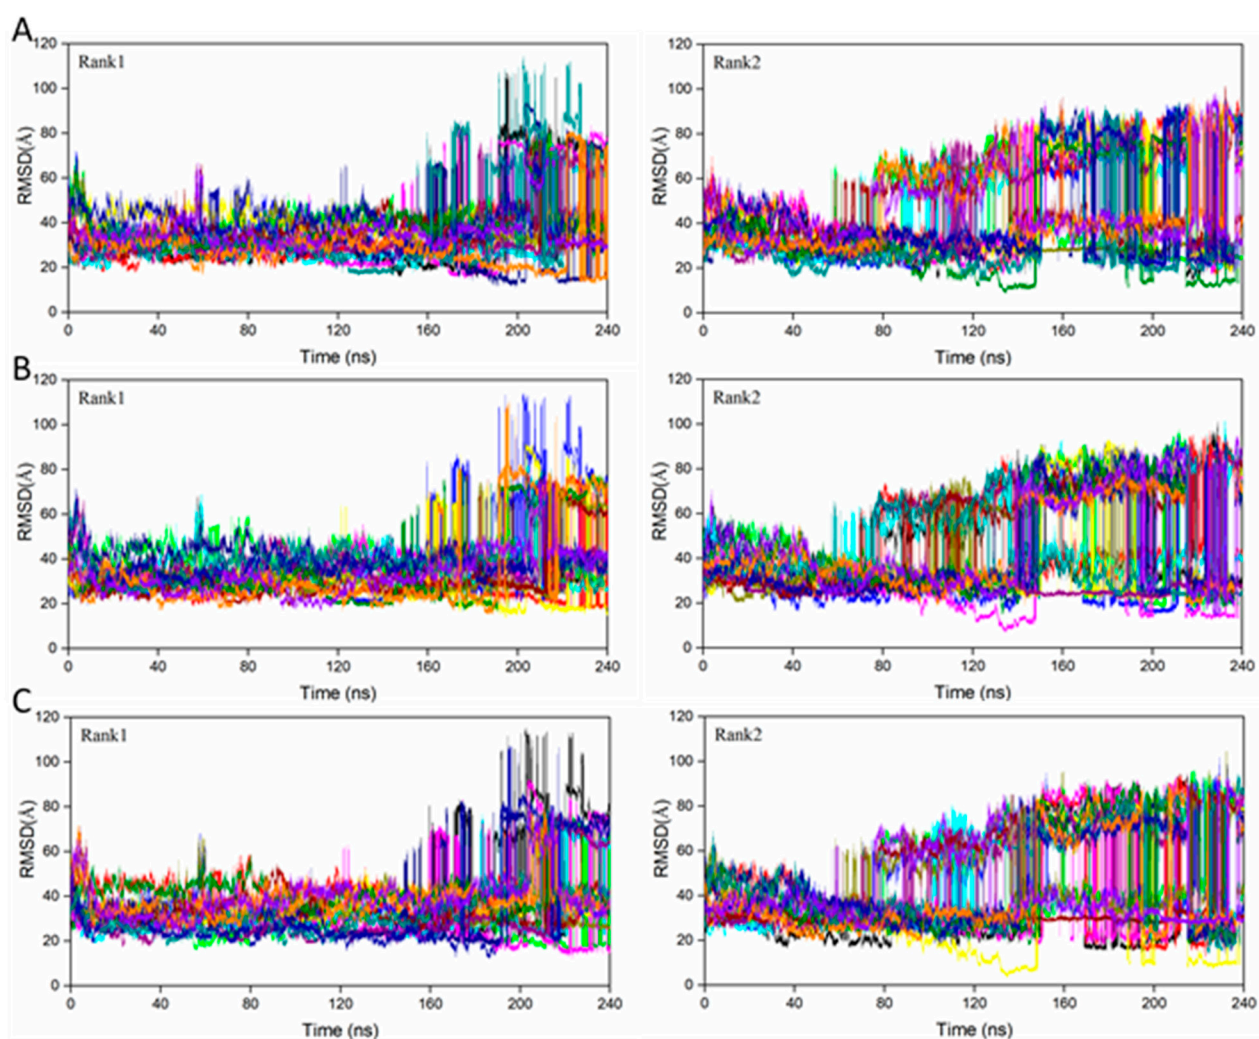

**Figure S18.** Time resolution of RMSD for wild type PCI\_Lip. (A) C10:0; (B) C6:0; (C) C16:0.

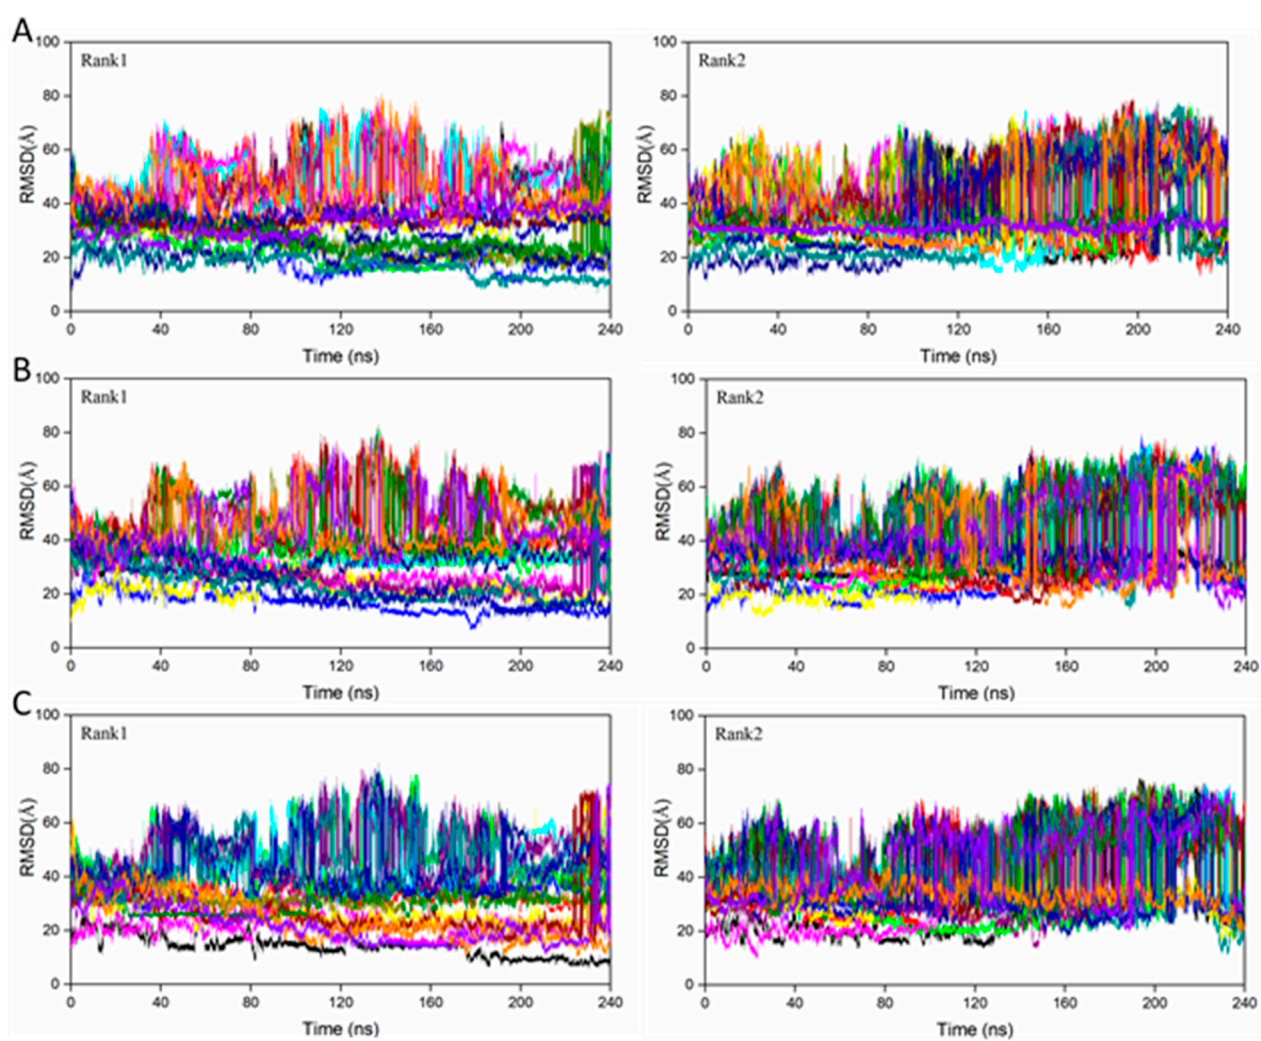

**Figure S19.** Time resolution of RMSD for L305A mutant of PCI\_Lip. (A) C10:0; (B) C6:0; (C) C16:0.

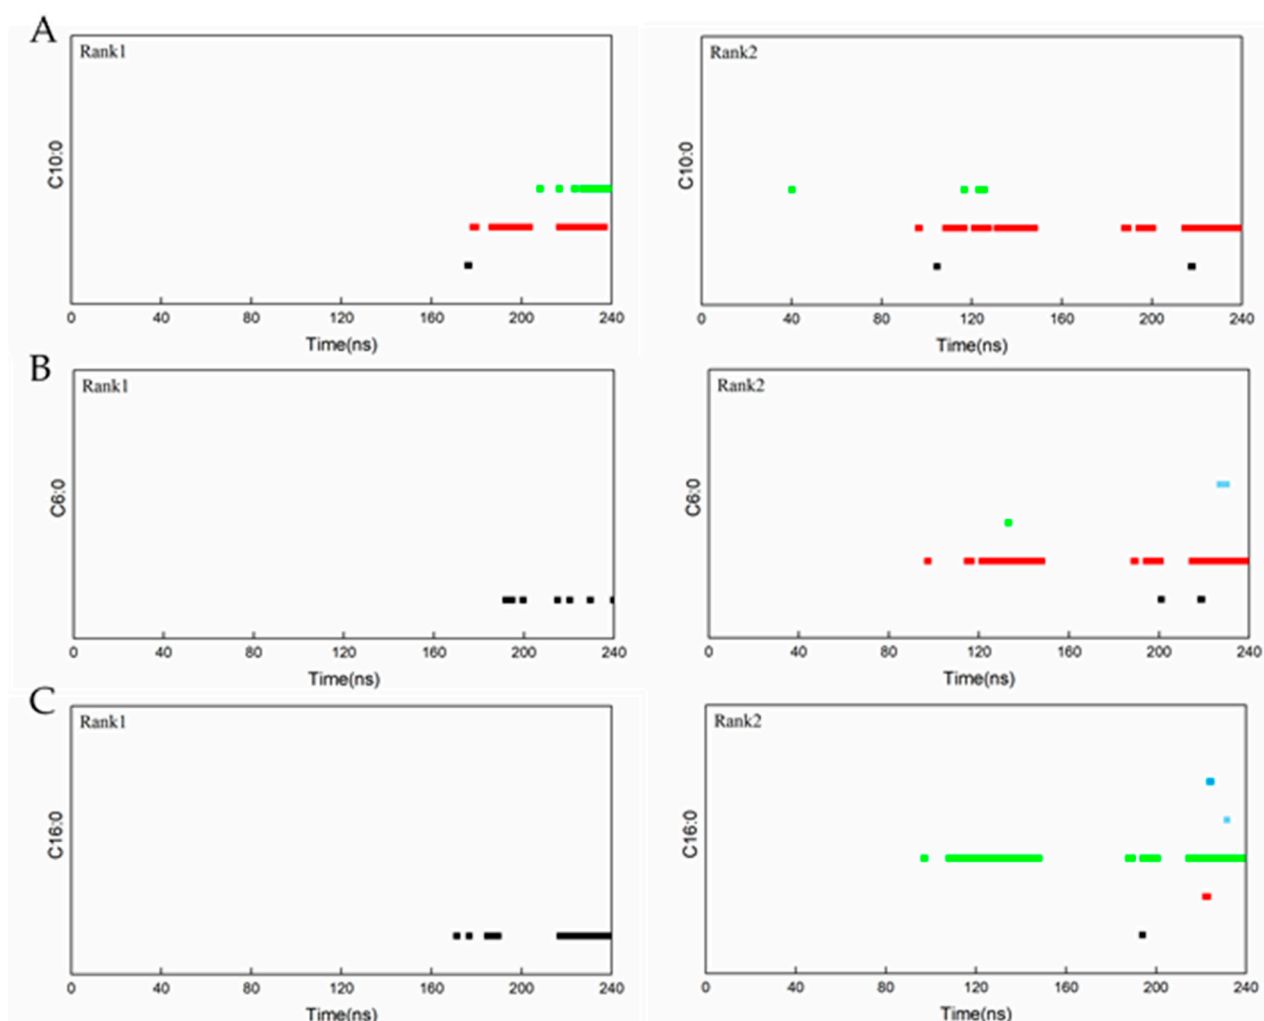

**Figure S20.** The binding time distribution of fatty acids which could enter the active pocket for wild type PCI\_Lip. A kind of color represented one binding time distribution of one fatty acid chain entering the active pocket. (A) C10:0; (B) C6:0; (C) C16:0.

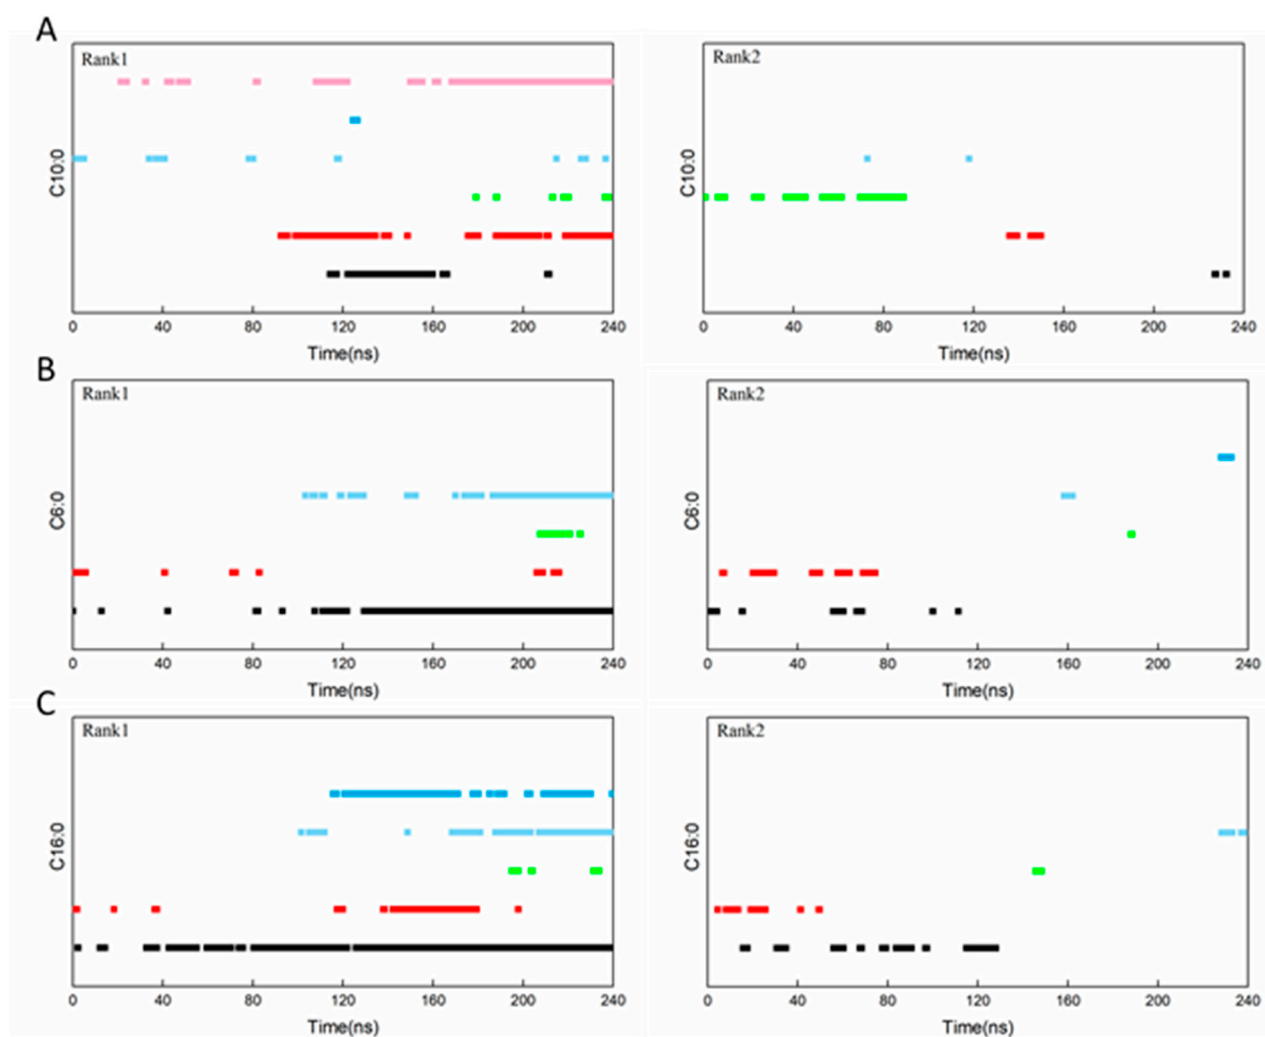

**Figure S21.** The binding time distribution of fatty acids which could enter the active pocket for L305A mutant of PCI\_Lip. A kind of color represented one binding time distribution of one fatty acid chain entering the active pocket. (A) C10:0; (B) C6:0; (C) C16:0.

**Table S51.** The number and binding time of the fatty acid chains entering the active center of wild type PCI\_Lip.

|                    | Fatty acid chain | No.1  | No.2  |
|--------------------|------------------|-------|-------|
| Number             | C10:0            | 3     | 3     |
|                    | C6:0             | 1     | 4     |
|                    | C16:0            | 3     | 5     |
| Total binding time | C10:0            | 24.36 | 43.86 |
|                    | C6:0             | 0.42  | 41.45 |
|                    | C16:0            | 4.47  | 60.12 |

**Table S52.** The number and binding time of the fatty acid chains entering the active center of L305A.

|                    | Fatty acid chain | No.1   | No.2  |
|--------------------|------------------|--------|-------|
| Number             | C10:0            | 6      | 4     |
|                    | C6:0             | 4      | 5     |
|                    | C16:0            | 5      | 4     |
| Total binding time | C10:0            | 117.6  | 8.51  |
|                    | C6:0             | 130.05 | 10.86 |
|                    | C16:0            | 209.1  | 11.98 |
